# Supplementary material for: Synthesis of cyclic peptide hemicryptophanes: enantioselective recognition of a chiral zwitterionic guest
Source: Royal Society of Chemistry journal article supplement (doi:10.1039/c3cc44784g), 2013-01-01
Supplement: c3cc44784g.pdf [file c3cc44784g.pdf]

## Electronic Supplementary Information

### Synthesis of cyclic peptide hemicryptophanes: enantioselective recognition of a chiral zwitterionic guest

James R. Cochrane, Aline Schmitt, Uta Wille and Craig A. Hutton\*

School of Chemistry, The University of Melbourne, Victoria, Australia, 3010

Tel: +61-3-8344 2393 Email: [chutton@unimelb.edu.au](mailto:chutton@unimelb.edu.au)

|                                                                                                               | Page    |
|---------------------------------------------------------------------------------------------------------------|---------|
| General information                                                                                           | S2–S3   |
| Experimental procedures                                                                                       | S4–S9   |
| References                                                                                                    | S9      |
| HPLC trace and MS for <i>PL-2</i>                                                                             | S10     |
| HPLC trace and MS for <i>ML-2</i>                                                                             | S11     |
| MS for <i>PL-2</i> + <i>R-9</i> complex                                                                       | S12     |
| MS for complexes of <i>PL-2</i> + guests                                                                      | S13     |
| CD spectra of <i>PL-2</i> and <i>ML-2</i>                                                                     | S14     |
| Job plot of <i>PL-2</i> + <i>R-9</i> titration                                                                | S14     |
| $K_a$ determinations from NMR titration data                                                                  | S15–S18 |
| $^1\text{H}$ , $^{13}\text{C}$ and 2D NMR data for <b>4</b> , <b>6</b> , <b>8</b> , <i>PL-2</i> , <i>ML-2</i> | S19–S37 |
| Gaussian archive file for <i>PL-2</i> : <i>S-9</i> complex                                                    | S38–S39 |

## General Information

$^1\text{H}$  NMR spectra were recorded using a Varian Unity Inova 500 (500 MHz) a Varian Unity Inova 400 (400 MHz) or a Bruker AVANCE2 500 MHz spectrometer with TXI cryoprobe. Spectra were recorded at 298 K. Spectra were obtained in deuterated DMSO, unless otherwise stated, utilising the residual solvent peak as the internal reference. The spectra are reported as: parts per million (ppm) downfield shift, relative to the residual solvent peak; relative integral, multiplicity (s = singlet, br = broad, d = doublet, t = triplet, q = quartet, dd = doublet of doublets, dt = doublet of triplets, dq doublet of quartets, m = multiplet) and coupling constant ( $J$  in Hz).  $^{13}\text{C}$  NMR spectra were recorded using a Varian Unity Inova 500 (125 MHz) or a Varian Unity Inova 400 (100 MHz) and spectra were obtained at 298 K unless stated otherwise. Chemical shifts ( $\delta$ ) are reported in parts per million (ppm) relative to the internal standard of the solvent peak; DMSO (39.5). IR spectra were recorded on a Perkin Elmer FT-IR spectrometer and were obtained from a thin film of the neat product. Absorption maxima are expressed in wavenumbers ( $\text{cm}^{-1}$ ). All mass spectra were recorded on an Agilent 6220 ESI-TOF Mass Spectrometer coupled to an Agilent 1100 LC System (Agilent, Palo Alto, CA). All data were acquired and reference mass corrected via a dual spray electrospray ionisation (ESI) source. Acquisition was performed using the Agilent Mass Hunter software version B.02.01 and analysis was performed using the Agilent Mass Hunter software version B.04.00. Melting points were determined using an Electrothermal melting point apparatus and are uncorrected. Optical rotations were measured with a Jasco DIP-1000 polarimeter at 589 nm with a cell path length of 10 cm; solution concentrations are reported in grams per 100 ml using the indicated spectroscopic grade solvents.

Most reagents were commercially available reagent grade chemicals and were used without further purification. Toluene was distilled over sodium. Anhydrous THF,  $\text{Et}_2\text{O}$  and  $\text{CH}_2\text{Cl}_2$  were obtained from solvent drying and dispensing system where the solvent was dried by passage through two packed columns of neutral alumina. Methanol and triethylamine were distilled from calcium hydride. Powdered molecular sieves were activated with a microwave and allowed to cool under vacuum. DMSO and DMF were dried over activated sieves (4 Å) for 16 h before use. DMSO was degassed using the freeze-thaw method (3 repetitions) followed by bubbling with argon for 30 min.

Analytical thin layer chromatography was performed with aluminium backed plates precoated with silica gel 60 F254 (0.2 mm), and visualisation was achieved by inspection under short-wave UV light followed by staining with phosphomolybdic acid dip [polyphosphomolybdic acid (12 g), ethanol (250mL)]. Flash chromatography was performed using silica gel (230-400 mesh); eluting solvents reported as % v/v mixtures Analytical, preparative and semi-preparative reverse phase

HPLC (RP-HPLC) were performed using an Agilent 1200 series LC System. Analytical HPLC employed a SGE Protecol-P C18 HPH 125 column ( $4.6 \times 150$  mm column,  $5 \mu\text{m}$  particle size, flow rate of  $1 \text{ mL min}^{-1}$ ). Preparative RP-HPLC employed a Phenomenex C18 column ( $21.2 \times 150$  mm,  $5 \mu\text{m}$  particle size, flow rate  $8 \text{ mL min}^{-1}$ ). Semi-preparative RP-HPLC employed a Phenomenex Synergy Hydro-RP column ( $50 \times 21.2$  mm,  $4 \mu\text{m}$  particle size, flow rate  $5 \text{ mL min}^{-1}$ ). The mobile phase consisted of eluents A (0.1% TFA in water) and B (0.1% TFA in acetonitrile). The results were analysed on Agilent ChemStation version B.01.03 software.

(*R*)-Carnitine was obtained from Sigma Aldrich. (*S*)-Carnitine was synthesised from (*R*)-carnitine according to the procedure of Giannessi et al.<sup>1</sup>

## General methods

### *General methods for Manual Peptide Synthesis:*

**Resin loading:** 2-Chlorotriptyl resin (1.0 g,  $1.7 \text{ mmol/g}$ ) was swollen with  $\text{CH}_2\text{Cl}_2$  (5 mL) for 30 min. To this was added a solution of Fmoc-Gly-OH (1.0 g,  $3.4 \text{ mmol}$ ) in 4:1  $\text{CH}_2\text{Cl}_2$ :DMF (5 mL). The mixture was treated with diisopropylethylamine (1.4 mL,  $8.5 \text{ mmol}$ ) and agitated for 16 h. MeOH (20 mL) was added and the solution stirred for a further 20 min. The resin was then filtered and washed with  $\text{CH}_2\text{Cl}_2$  ( $3 \times 20 \text{ mL}$ ), DMF ( $3 \times 20 \text{ mL}$ ) and  $\text{CH}_2\text{Cl}_2$  ( $5 \times 20 \text{ mL}$ ). The resin was then dried under reduced pressure. The loading was tested by deprotecting the resin with 20% piperidine in DMF ( $2 \times 10 \text{ mL}$  for 5 min) and then measuring the absorbance of the piperidine-fulvene adduct at  $\lambda = 301 \text{ nm}$ .

**Iterative peptide assembly:** The hexapeptide (**3/4**) was synthesized by coupling amino acids manually in polypropylene syringes with sintered discs (Torviq) on a  $0.25 \text{ mmol}$  scale. The following sequence of steps was used; deprotection, washing, coupling, and washing.

**Deprotection:** The resin was treated with 20% piperidine in DMF ( $2 \times 10 \text{ mL}$  for 5 min) A TNBSA test for the detection of primary amines was then carried out. If the test was negative, the deprotection step was done again. Otherwise, the next coupling was carried out.

**TNBSA test:** A small sample of resin was treated with DIPEA ( $20 \mu\text{L}$ ) and 2,4,6-trinitrobenzene sulfonic acid ( $20 \mu\text{L}$ ). The resin turns orange in less than ten minutes if the test is positive.

**Washing:** The resin was sequentially washed with DMF ( $5 \times 5 \text{ mL}$ ),  $\text{CH}_2\text{Cl}_2$  ( $5 \times 5 \text{ mL}$ ) and DMF ( $5 \times 5 \text{ mL}$ ).

**Coupling:** A solution of the Fmoc-amino acid (4 eq), PyBOP (4 eq) and diisopropylethylamine (8 eq) was dissolved in DMF (5 mL) and added to the resin. The resin was then shaken on an orbital shaker (175 rpm) for 2 h. A TNBSA test was then carried out. If the test was positive, the coupling step was repeated.

#### *General methods for Microwave Peptide Synthesis*

All linear peptides were synthesised using a CEM microwave peptide synthesiser. Solid phase synthesis was carried out on a 0.25 mmol scale using Fmoc/*t*Bu chemistry on the previously synthesised Fmoc-Gly loaded 2-chlorotritylchloride resin (0.66 mmol/g) and using commercially available appropriately protected amino acid subunits. All amino acid subunits were coupled using HATU (0.5 M) as the activating agent. Couplings were performed at 70 °C for 300 sec.

**Deprotection:** Fmoc deprotection was performed with a 35% solution of piperidine in DMF (3 × 5 mL) for 5 min.

#### **Protected linear peptide 3**

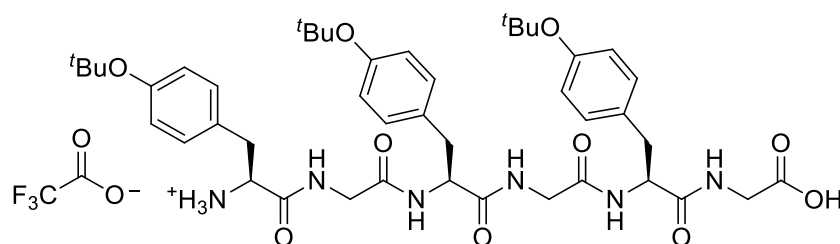

**Method A:** The hexapeptide **3** was synthesised following the general method for *manual solid phase peptide synthesis*. The peptide was cleaved from the resin by agitating with 1% TFA in 4:1 MeCN:H<sub>2</sub>O (3 × 10 mL) for 20 min. The solvent was removed under reduced pressure and the residue azeotropically distilled with toluene (3 × 30 mL). The residue was then triturated with Et<sub>2</sub>O (3 × 40 mL) to afford **3** as an amorphous colourless solid (0.16 g, 65%, based on 0.25 mmol scale, 0.65 mmol/g loading), which was used without further purification. Mp: 220–225 °C (dec), MS (ESI) *m/z* 847 [(M+H)<sup>+</sup>, 100%]; HRMS (ESI, [M+H]<sup>+</sup>) calcd. for C<sub>45</sub>H<sub>63</sub>O<sub>10</sub>N<sub>6</sub> 847.4606, found 847.4610. Analytical HPLC: retention time: 13.1 min (gradient of acetonitrile: 0% to 100% in 25 min). Peptide **3** was extremely insoluble so further characterisation was performed on the deprotected peptide **4**. This was obtained by treating a sample of **3** with 5% TFA in 4:1 MeCN:H<sub>2</sub>O for 1 h, followed by evaporation of the solvent and ether trituration.

**Method B:** Peptide **3** was synthesised according to the general method for *microwave peptide synthesis*. The peptide was cleaved from the resin by agitating with 1% TFA in 4:1 MeCN:H<sub>2</sub>O (3 × 10 mL) for 20 min. The solvent was removed under reduced pressure and the residue azeotropically distilled with toluene (3 × 30 mL). The residue was then triturated with Et<sub>2</sub>O (3 × 40 mL). This afforded **3** as an amorphous colourless solid that was used without further purification (0.22 g, 91%, based on 0.25 mmol scale, 0.65 mmol/g loading). Characterisation identical to that described above.

#### Deprotected linear peptide 4

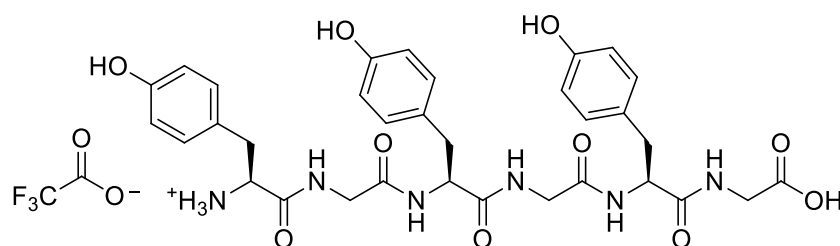

Peptide **4** was synthesised according to the general method for microwave peptide synthesis. The peptide was cleaved from the resin by agitating with 5% TFA in 4:1 MeCN:H<sub>2</sub>O (3 × 10 mL) for 20 min. The solvent was removed under reduced pressure and the residue azeotropically distilled with toluene (3 × 30 mL). The residue was then triturated with Et<sub>2</sub>O (3 × 40 mL) to afford **4** as an amorphous colourless solid (0.17 g, 85%, based on 0.25 mmol scale, 0.65 mmol/g loading), which was used without further purification. Mp: 200–205 °C;  $[\alpha]_D^{24} +72$  (*c* 0.30, DMSO); MS (ESI) *m/z* 679 [(M+H)<sup>+</sup>, 100%]; HRMS (ESI, [M+H]<sup>+</sup>) calcd. for C<sub>33</sub>H<sub>39</sub>N<sub>6</sub>O<sub>10</sub> 679.2728 found 679.2726; IR (Thin film): 3285, 1628, 1513, 1442, 1408, 1209 cm<sup>-1</sup>; <sup>1</sup>H NMR (400 MHz, DMSO) δ 9.34 (1 H, br s), 9.21 (2 H, br s), 8.58 (1 H, t, *J* = 5.31 Hz), 8.27–8.20 (3 H, m), 8.03 (1 H, d, *J* = 8.6 Hz), 7.03–6.99 (6 H, m), 6.68 (2 H, d, *J* = 8.4 Hz), 6.62 (4 H, d, *J* = 8.4 Hz), 4.43 (3 H, m), 3.89–3.57 (4 H, m), 2.97–2.87 (3 H, m), 2.75–2.72 (2 H, m), 2.67–2.59 (3 H, m) (4 exchangeable protons obscured or not observed); <sup>13</sup>C NMR (100 MHz, DMSO) δ 171.5, 171.5, 171.2, 171.2, 169.0, 168.5, 168.1, 156.5, 155.8 (2 C), 130.5, 130.1 (2 C), 127.9(3), 127.9(0), 125.2, 115.4, 115.0 (2 C), 54.4, 54.3, 54.0, 41.9, 41.8, 41.0, 36.9, 36.9, 36.7.

### Cyclic hexapeptide c(YGYGYG) **6**

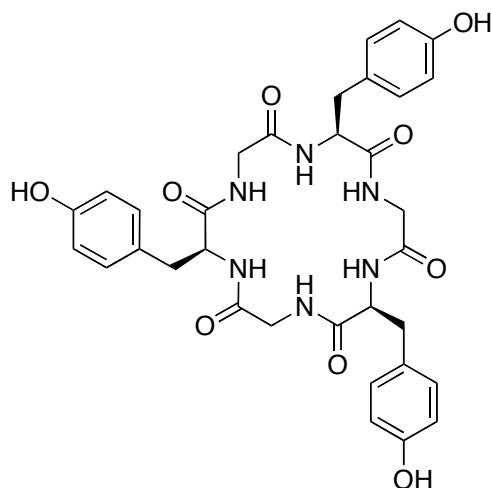

**Method A:** Under an atmosphere of nitrogen, diisopropylethylamine (25  $\mu$ L, 0.96 mmol) was added to a solution of peptide **3** (0.18 g, 0.19 mmol) and PyBop (0.30 g, 0.58 mmol) in DMF (40 mL). The mixture was stirred for 16 h at room temperature. The solvent was removed under vacuum and the residue was dissolved in chloroform (50 mL) and water (50 mL). The organic layer was separated and the aqueous phase was extracted with chloroform ( $2 \times 50$  mL). The combined organic layers were washed with water ( $3 \times 100$  mL). The organic solvent was removed under vacuum and the residue was triturated with ether ( $3 \times 20$  mL) to give the crude protected cyclic peptide **5** (98 mg, 62%). MS (ESI)  $m/z$  829; HRMS (ESI,  $[M+H]^+$ ) calcd. for  $C_{45}H_{61}O_9N_6$  829.4500, found 829.4495; HPLC: retention time: 15.3 min (gradient of acetonitrile: 0% to 100% in 25 min). A solution of 9:0.5:0.5 TFA:H<sub>2</sub>O:CH<sub>2</sub>Cl<sub>2</sub> was added to **5** (98 mg) and the solution was stirred for 1 h. The TFA was evaporated and the residue dissolved in a 1:1 solution of acetonitrile and water, filtered and lyophilised. The lyophilised solid was dissolved in minimal DMSO and purified by RP-HPLC with a gradient of acetonitrile (0 min: 15% MeCN, 60 min: 40% MeCN, Hydro-80 column) to give **6** (30 mg, 24% for the cyclisation and deprotection); Mp: 210–214 °C (dec);  $[\alpha]_D^{24}$  –30 (c 0.26, DMSO); MS (ESI)  $m/z$  661  $[(M+H)^+]$ , 100%; HRMS (ESI,  $[M+H]^+$ ) calcd. for  $C_{33}H_{37}N_6O_9$  661.2622, found. 661.2616; IR (Thin film): 3286, 1662, 1638, 1539, 1513, 1239  $cm^{-1}$ ; <sup>1</sup>H NMR (500 MHz, DMSO)  $\delta$  9.16 (3 H, br s), 8.18 (3 H, t,  $J = 5.7$  Hz), 7.99 (3 H, d,  $J = 7.6$  Hz), 6.96 (6 H, d,  $J = 8.5$  Hz), 6.63 (6 H, d,  $J = 8.5$  Hz), 4.27 – 4.19 (3 H, m), 3.71 (3 H, dd,  $J = 15.9, 5.3$ ), 3.48 (3 H, dd,  $J = 15.9, 6.0$  Hz), 2.95 (3 H, dd,  $J = 13.8, 5.6$  Hz), 2.75 (3 H, dd,  $J = 13.8, 8.8$  Hz); <sup>13</sup>C NMR (126 MHz, DMSO)  $\delta$  171.1, 168.8, 155.8, 129.9, 127.8, 115.0, 54.8, 42.6, 35.7. HPLC: retention time: 15.3 min (gradient of acetonitrile: 0% to 100% in 25 min).

**Method B:** Under an atmosphere of nitrogen, diisopropylethylamine (475  $\mu$ L, 2.85 mmol) was added to a solution of the deprotected peptide **4** (450 mg, 0.57 mmol) and PyBop (887 mg, 1.71

mmol) in DMF (114 mL). The solution was stirred for 1 h. The solvent was then evaporated and the residue was redissolved in 3:1 chloroform:isopropanol and absorbed onto silica. Purification by flash chromatography ( $\text{SiO}_2$ ) eluting with 10–100% MeOH in  $\text{CH}_2\text{Cl}_2$  afforded **6** (376 mg, quantitative). Characterisation identical to that described above.

### Tris-vanillyl cyclic peptide **8**

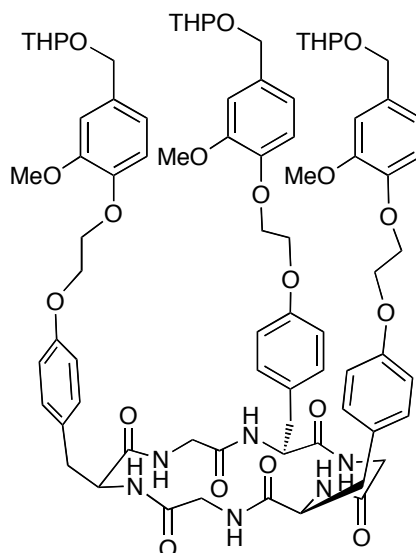

The cyclic peptide **6** (60 mg, 90  $\mu\text{mol}$ ), vanillyl ethylbromide **7**<sup>2,3</sup> (0.16 g, 0.45 mmol) and cesium carbonate (0.15 g, 0.45 mmol) were dissolved in DMSO (3 mL). The solution was stirred for 16 h at 60 °C. The solvent was evaporated and the residue was purified by flash chromatography ( $\text{SiO}_2$ ) eluting with 5–10% MeOH in  $\text{CH}_2\text{Cl}_2$  to afford **8** as a colourless solid (60 mg, 55%). Mp. 240–243 °C;  $[\alpha]_D^{24}$  –15 (*c* 0.67,  $\text{CHCl}_3$ ); MS (ESI)  $m/z$  1475  $[(M+\text{Na})^+]$ , 100%; HRMS (ESI,  $[(M+\text{Na})^+]$ ) calcd. for  $\text{C}_{78}\text{H}_{96}\text{N}_6\text{O}_{21}\text{Na}$  1475.6526, found 1475.6521; IR (Thin film): 3284, 2941, 1656, 1632, 1509, 1252, 1233, 1036  $\text{cm}^{-1}$ ;  $^1\text{H}$  NMR (500 MHz,  $\text{DMSO}-d_6$ )  $\delta$  8.21 (3 H, t,  $J = 5.3$  Hz), 8.09 (3 H, br s), 7.12 (6 H, d,  $J = 8.7$  Hz), 6.97 (3 H, d,  $J = 8.2$ ), 6.93 (3 H, d,  $J = 1.9$  Hz), 6.87 (6 H, d,  $J = 8.7$  Hz), 6.85 (3 H, dd,  $J = 8.2, 1.9$  Hz), 4.64 (3 H, m), 4.59 (3 H, d,  $J = 12.0$  Hz), 4.37 (3 H, d,  $J = 12.0$  Hz), 4.30 (3 H, m), 4.25 (12 H, s), 3.8 (3 H, dd,  $J = 8.0, 3.3$  Hz), 3.78 (3 H, dd,  $J = 8.0, 3.3$  Hz), 3.74 (9 H, s), 3.51–3.44 (6 H, m), 3.04 (3 H, dd,  $J = 14.0, 5.3$  Hz), 2.86 (3 H, m), 1.76–1.60 (6 H, m), 1.53–1.45 (12 H, m);  $^{13}\text{C}$  NMR (126 MHz,  $\text{DMSO}$ ) 171.1, 168.9, 156.9, 148.9, 147.2, 131.2, 130.2, 130.0, 120.2, 114.2, 113.2, 112.0, 97.1, 68.0, 67.2, 66.3, 61.4, 55.5, 54.7, 42.6, 35.6, 30.2, 25.1, 19.1; IR (Thin film): 3284, 2941, 1656, 1632, 1509, 1252, 1233, 1036  $\text{cm}^{-1}$ .

## Hemicryptophanes *ML-2* and *PL-2*

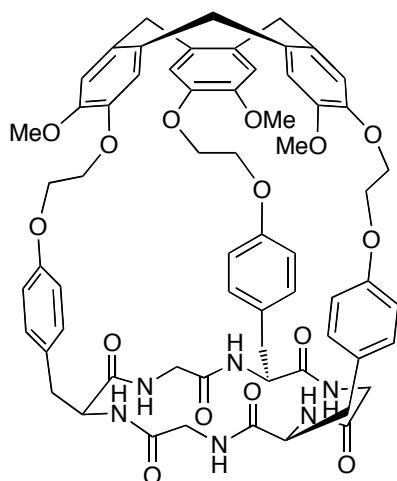

***ML-2***

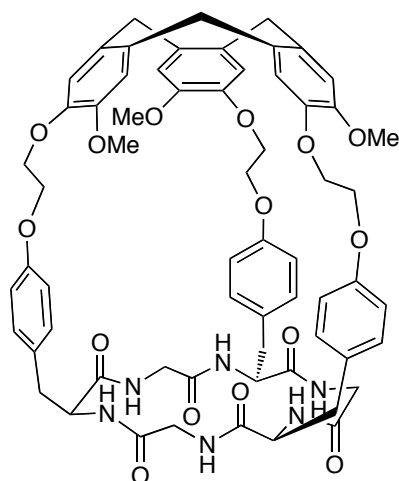

***PL-2***

The tris-vanillyl cyclic peptide **8** (66 mg, 0.045 mmol) was dissolved in formic acid (10 mL) and the solution was stirred for 3 h at room temperature. The solvent was then evaporated and the residue was partitioned between chloroform (20 mL) and aqueous potassium carbonate (10%, 20 mL). The aqueous phase was extracted with chloroform (2 × 10 mL). The combined organic layers were washed with distilled water (2 × 20 mL) and dried (MgSO<sub>4</sub>). The solvent was evaporated and the residue was purified by flash chromatography (SiO<sub>2</sub>) eluting with (5–10% MeOH in CH<sub>2</sub>Cl<sub>2</sub>) to give *ML-2* as a colourless amorphous solid (11 mg, 21%). Further elution gave *PL-2* as a colourless amorphous solid (22 mg, 43%).

*ML-2*; R<sub>f</sub> = 0.2 (10% MeOH in CH<sub>2</sub>Cl<sub>2</sub>); Mp. 240–243 °C; [ $\alpha$ ]<sub>D</sub><sup>24</sup> +25 (*c* 0.25, MeOH); MS (ESI) *m/z* 1147 [(M+H)<sup>+</sup>, 100%]; HRMS (ESI, [M+H]<sup>+</sup>) calcd. for C<sub>63</sub>H<sub>67</sub>N<sub>6</sub>O<sub>15</sub> 1147.4659, found 1147.4655; IR (Thin film): 3331, 1656, 1605, 1511, 1252 cm<sup>-1</sup>; <sup>1</sup>H NMR (500 MHz, acetone-*d*<sub>6</sub>)  $\delta$  7.26 (3 H, br s, 1–NH), 7.17 (3 H, s, H18), 7.13 (3 H, s, H15), 7.09 (6 H, d, *J* = 8.4 Hz, H6, H10), 6.95 (3 H, d, *J* = 6.7 Hz, 3–NH), 6.77 (6 H, d, *J* = 8.4 Hz, H7, H9), 4.81 (3 H, d, *J* = 13.6 Hz, H19a), 4.49 (3 H, dt, *J* = 7.7, 5.3 Hz, H3), 4.38–4.31 (6 H, m, H11), 4.25–4.20 (6 H, m, H12), 3.93 (3 H, d, *J* = 16.4 Hz, H1a), 3.72 (9 H, s, 14-OMe), 3.58 (3 H, d, *J* = 13.6 Hz, H19b), 3.36 (3 H, d, *J* = 16.4 Hz, H1b), 3.11 (3 H, dd, *J* = 14.5, 7.0 Hz, H4a), 2.95 (3 H, dd, *J* = 14.5, 6.6 Hz, H4b). <sup>13</sup>C NMR (125 MHz, acetone-*d*<sub>6</sub>)  $\delta$  171.7 (C=O, C20), 170.3 (C=O, C2), 158.4 (Cq, C8), 149.8 (Cq, C14), 147.5 (Cq, C13), 134.3 (Cq, C17), 133.1 (Cq, C16), 131.2 (2 C, CH, C6, C10), 130.2 (Cq, C5), 118.0 (CH, C18), 115.6 (2 C, CH, C7, C9), 115.0 (CH, C15), 69.1 (CH<sub>2</sub>, C11), 67.2 (CH<sub>2</sub>, C12), 56.4 (CH<sub>3</sub>, 14-OMe), 55.2 (CH, C3), 43.6 (CH<sub>2</sub>, C1), 36.4 (CH<sub>2</sub>, C19), 35.8 (CH<sub>2</sub>, C4). CD (6.5·10<sup>-4</sup> M in CH<sub>2</sub>Cl<sub>2</sub>) 237 (–34.0), 253.3 (16.4), 276.5 (12.9). HPLC: retention time: 26.8(4) min (gradient of acetonitrile: 0 min: 30%; 3min: 30%; 83min: 60%).

**PL-2:**  $R_f = 0.1$  (10% MeOH in  $\text{CH}_2\text{Cl}_2$ ); Mpt. 240–243 °C;  $[\alpha]_D^{24} -48$  ( $c$  0.25, MeOH); MS (ESI)  $m/z$  1147  $[(M+H)^+]$ , 100%; HRMS (ESI,  $[M+H]^+$ ) calcd.  $\text{C}_{63}\text{H}_{67}\text{N}_6\text{O}_{15}$  1147.4659 found 1147.4643; IR (Thin film): 3309, 2931, 1662, 1509, 1251  $\text{cm}^{-1}$ .  $^1\text{H}$  NMR (500 MHz, acetone- $d_6$ )  $\delta$  7.92 (3 H, br s, 1–NH), 7.27 (3 H, s, H15), 7.12 (3 H, s, H18), 7.08 (6 H, d,  $J = 8.5$  Hz, H6, H10), 7.00 (3 H, d,  $J = 7.2$  Hz, 3–NH), 6.74 (6 H, d,  $J = 8.5$  Hz, H7, H9), 4.77 (3 H, d,  $J = 13.5$  Hz, H19a), 4.48 (3 H, dt,  $J = 7.2, 6.7$  Hz, H3), 4.23 (6 H, m, H11), 4.34 (6 H, m, H12), 4.02 (3 H, dd,  $J = 16.4, 3.1$  Hz, H1a), 3.68 (9 H, s, 14–OMe), 3.55 (3 H, d,  $J = 13.5$  Hz, H19b), 3.44 (3 H, d,  $J = 16.4$  Hz, H1b), 3.09 (3 H, dd,  $J = 14.2, 7.7$  Hz, H4a), 3.00 (3 H, dd,  $J = 14.2, 4.2$  Hz, H4b).  $^{13}\text{C}$  NMR (125 MHz, acetone- $d_6$ )  $\delta$  171.7 (C=O, C20), 170.6 (C=O, C2), 157.9 (Cq, C8), 149.4 (Cq, C14), 147.8 (Cq, C13), 133.8 (Cq, C16), 133.3 (Cq, C17), 131.4 (2 C, CH, C6, C10), 130.4 (Cq, C5), 116.7 (CH, C15), 115.9 (2 C, CH, C7, C9), 115.7 (CH, C18), 67.8 ( $\text{CH}_2$ , C12), 67.3 ( $\text{CH}_2$ , C11), 56.8 ( $\text{CH}_3$ , 14–OMe), 54.8 (CH, C3), 43.5 ( $\text{CH}_2$ , C1), 36.3 ( $\text{CH}_2$ , C19), 35.8 ( $\text{CH}_2$ , C4). CD ( $9.10^{-5}$  M in  $\text{CH}_2\text{Cl}_2$ ) 235.1 (23.2), 253.8 (-12.5), 278.7 (-19.9). HPLC: retention time: 26.8(0) min (gradient of acetonitrile: 0 min: 30%; 3 min: 30%; 83 min: 60%).

## ESI Mass Spectrometry Experiments

All high resolution MS experiments were conducted according to the following example. A solution of host hemicyptophane (0.785 mM in 20%  $\text{CH}_3\text{CN}$  in  $\text{H}_2\text{O}$ , 1000  $\mu\text{L}$ ) and guest (3.93 mM, 5 equiv.) was prepared and the mass spectrum recorded on an Agilent 6220 ESI-TOF mass spectrometer (Agilent, Palo Alto, CA). All data were acquired and reference mass corrected via a dual spray electrospray ionisation (ESI) source. Acquisition was performed using the Agilent Mass Hunter software version B.02.01 and analysis was performed using the Agilent Mass Hunter software version B.04.00.

## References

1. I. Bernabei, R. Castagnani, A. F. De, W. S. P. De, F. Giannessi, D. Misiti, S. Muck, N. Scafetta and M. O. Tinti, *Angew. Chem. Int. Ed. Engl.*, 1994, **33**, 2076-2078.
2. T. Brotin, T. Devic, A. Lesage, L. Emsley and A. Collet, *Chem. - Eur. J.*, 2001, **7**, 1561-1573.
3. P. D. Raytchev, O. Perraud, C. Aronica, A. Martinez and J.-P. Dutasta, *J. Org. Chem.*, 2010, **75**, 2099-2102.

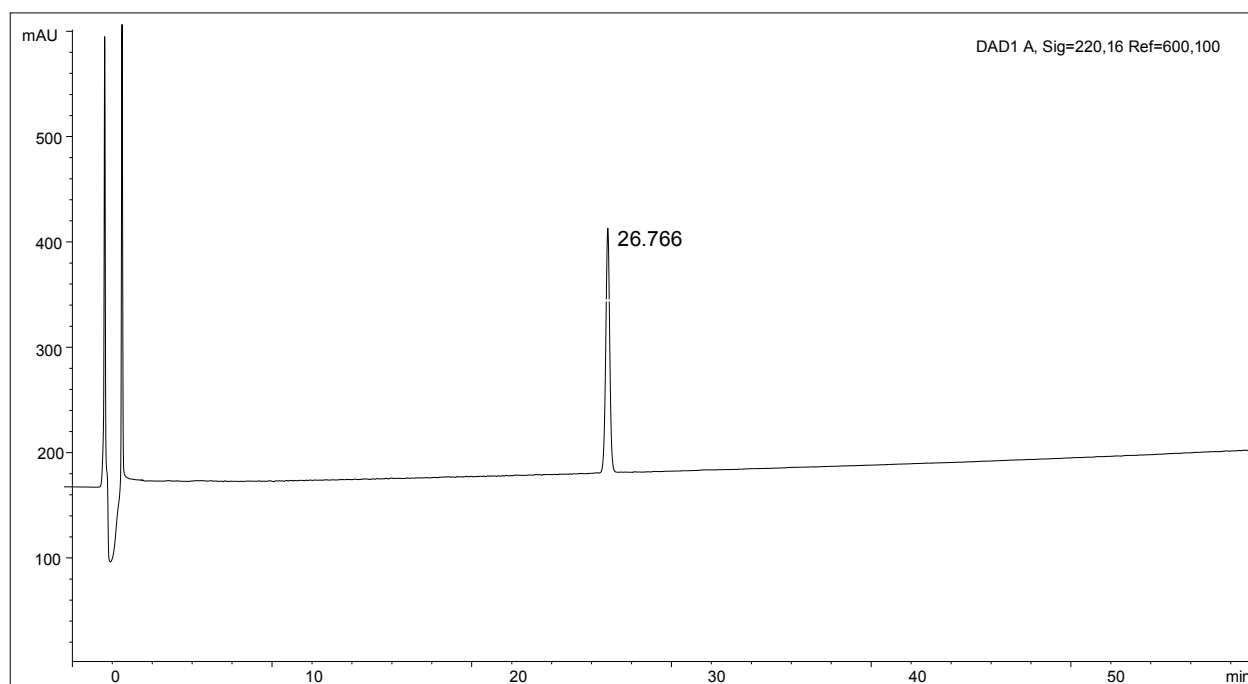

**Fig. ESI-1** HPLC Trace of hemicryptophane *PL-2*

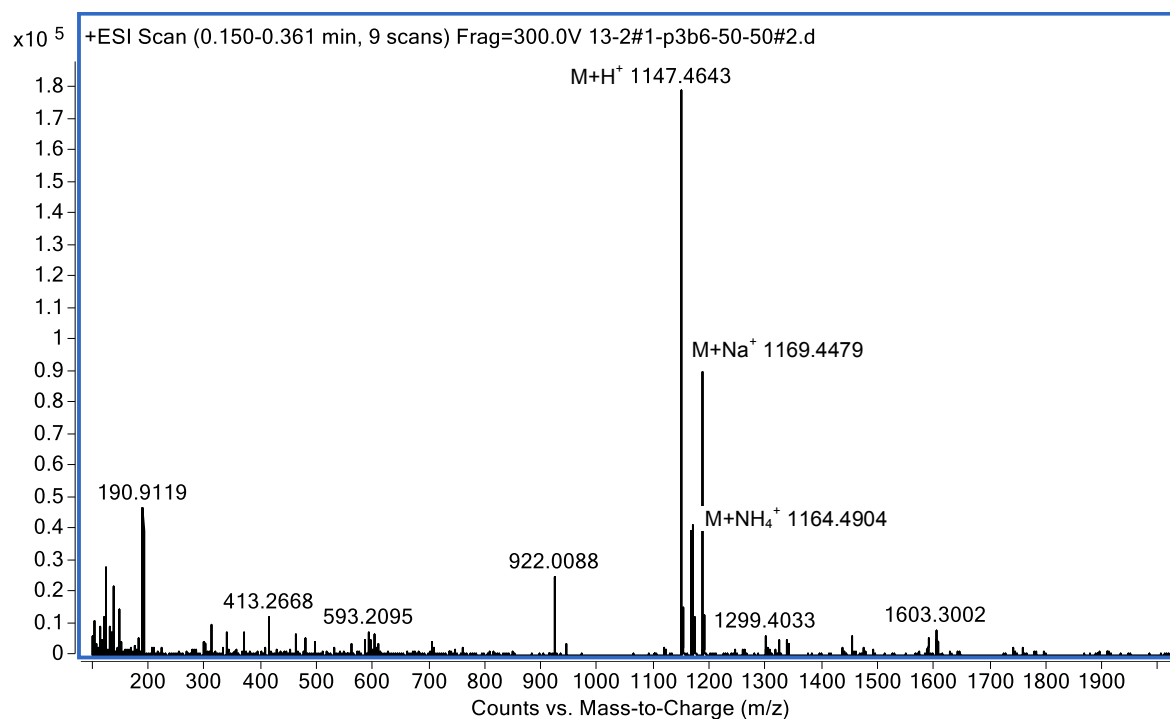

**Fig. ESI-2** ESI MS of hemicryptophane *PL-2*

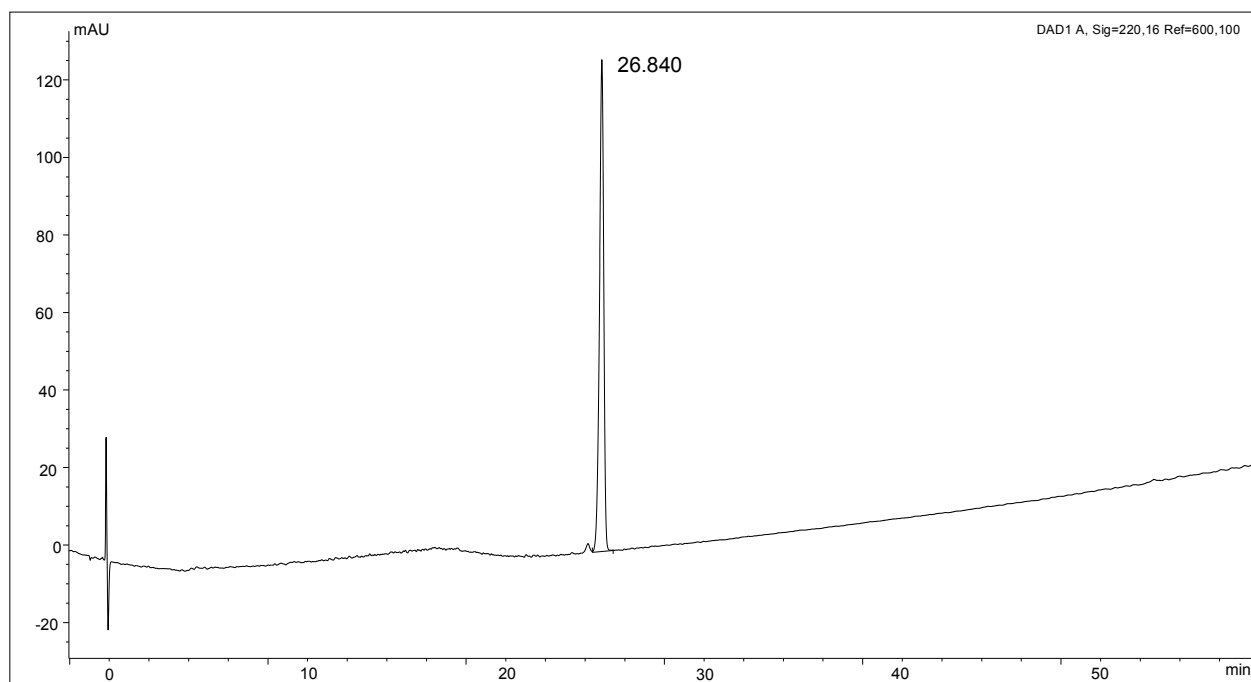

**Fig. ESI-3** HPLC Trace of hemicryptophane *ML-2*

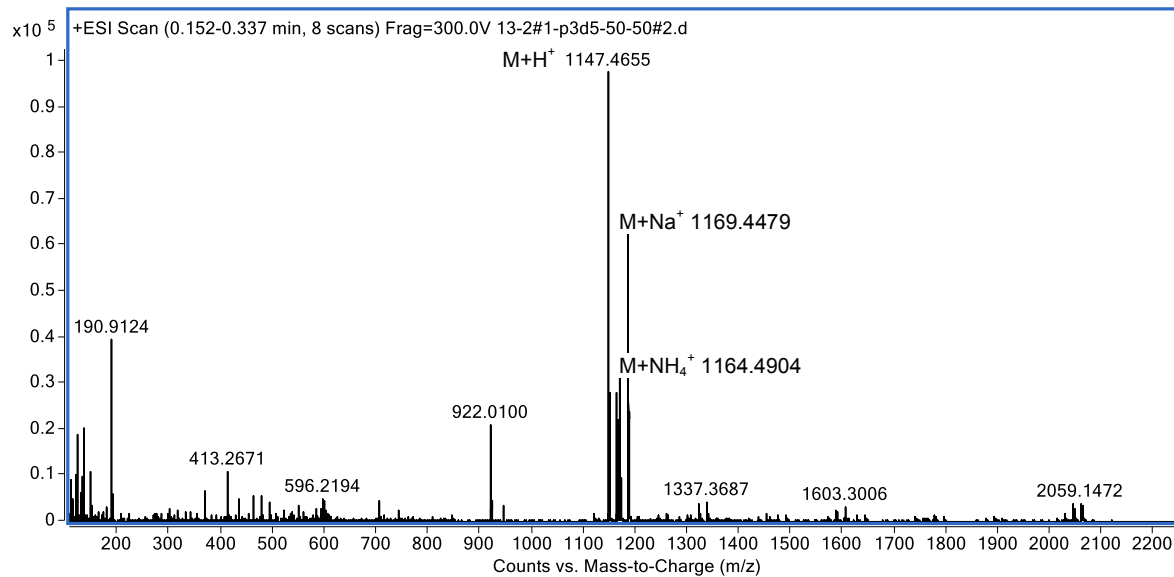

**Fig. ESI-4** ESI MS of hemicryptophane *ML-2*

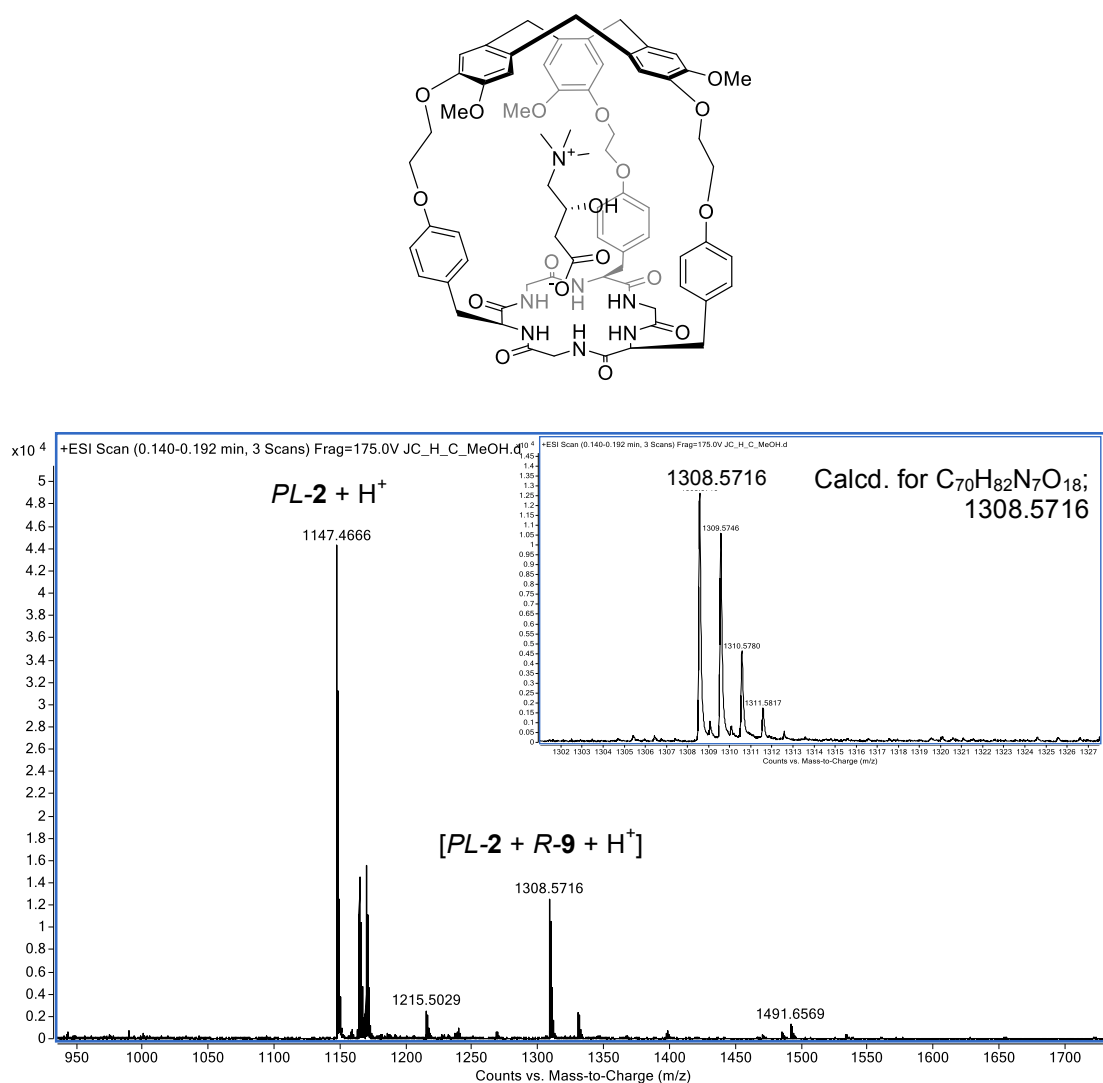

**Fig. ESI-5** ESI MS of host:guest complex of hemicyptophane + carnitine; *PL-2* + *R-9*

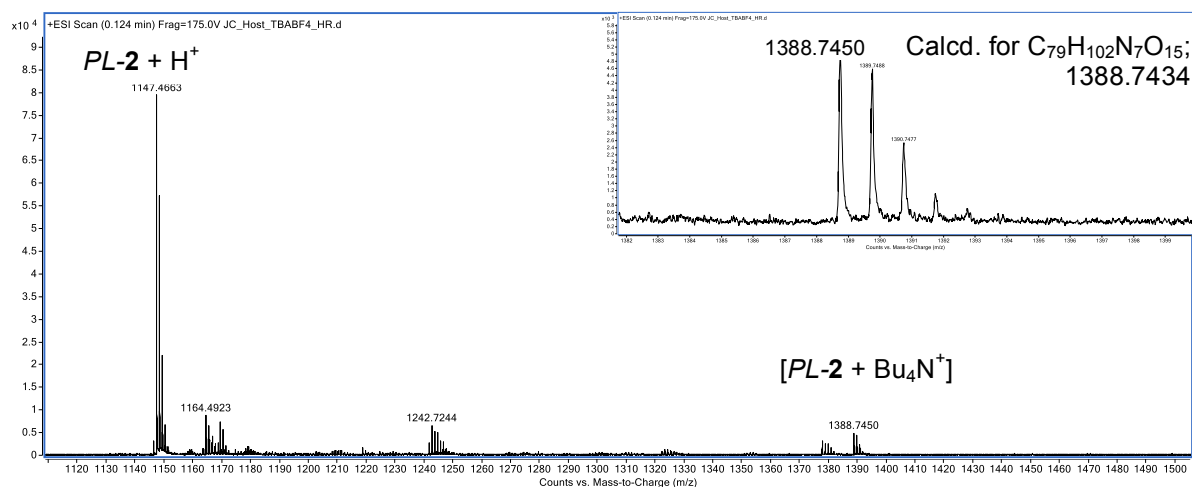

**Fig. ESI-6** ESI MS of hemicyptophane *PL-2* + Bu<sub>4</sub>N<sup>+</sup>BF<sub>4</sub><sup>-</sup>

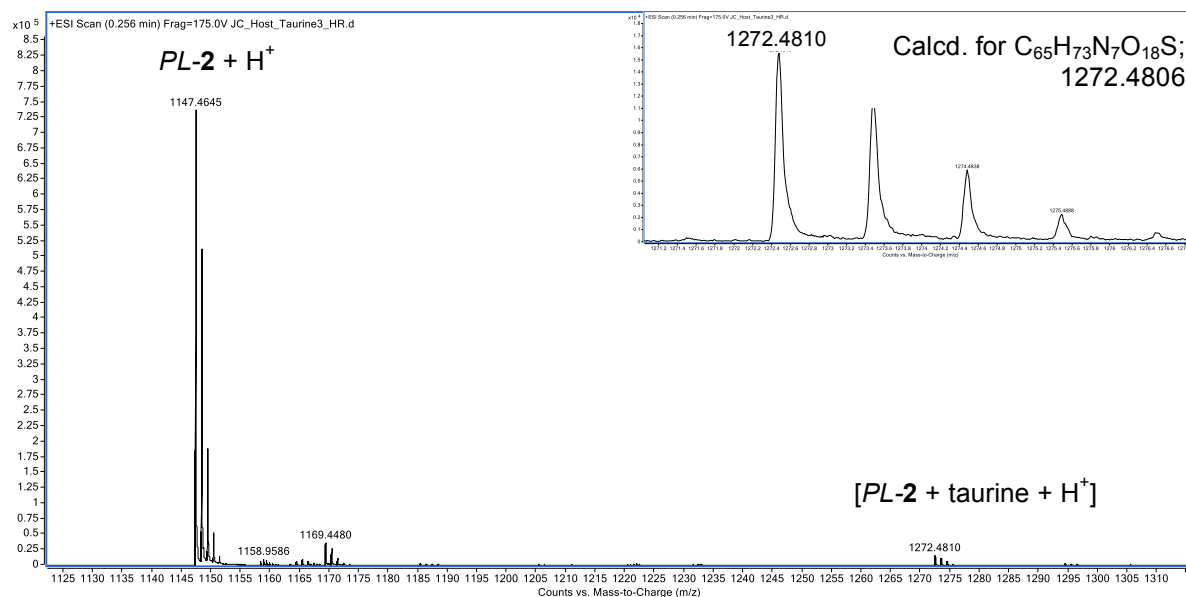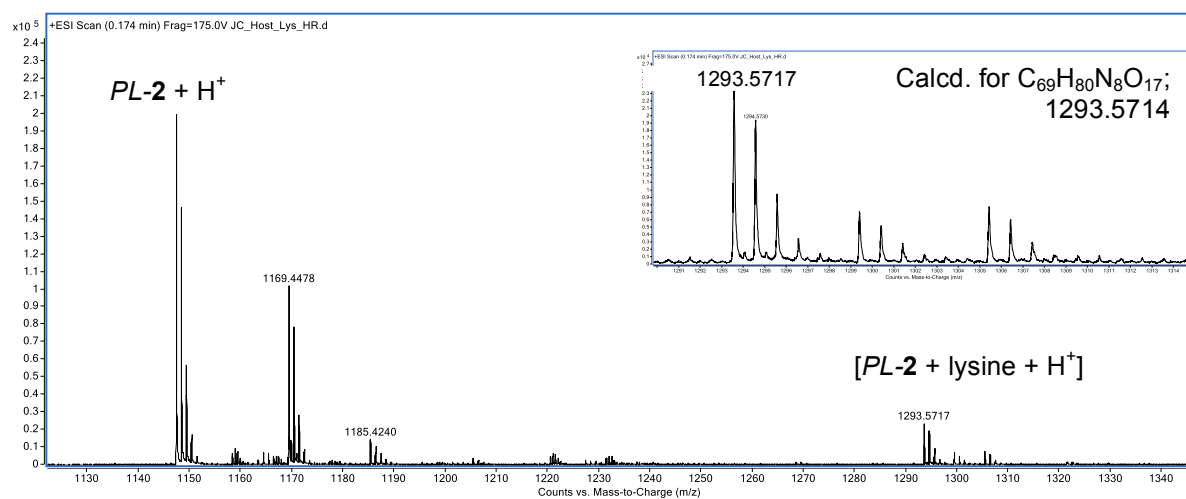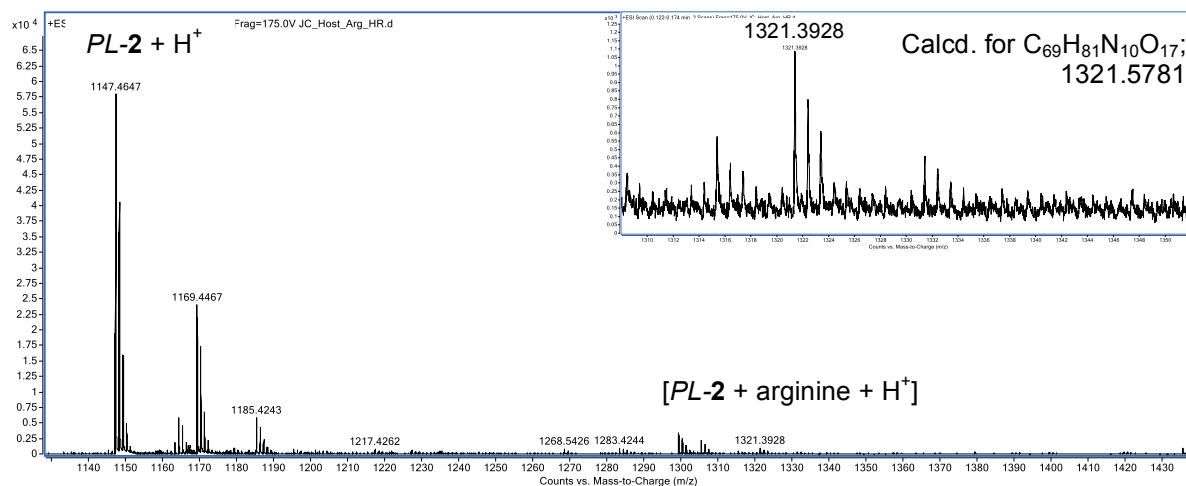

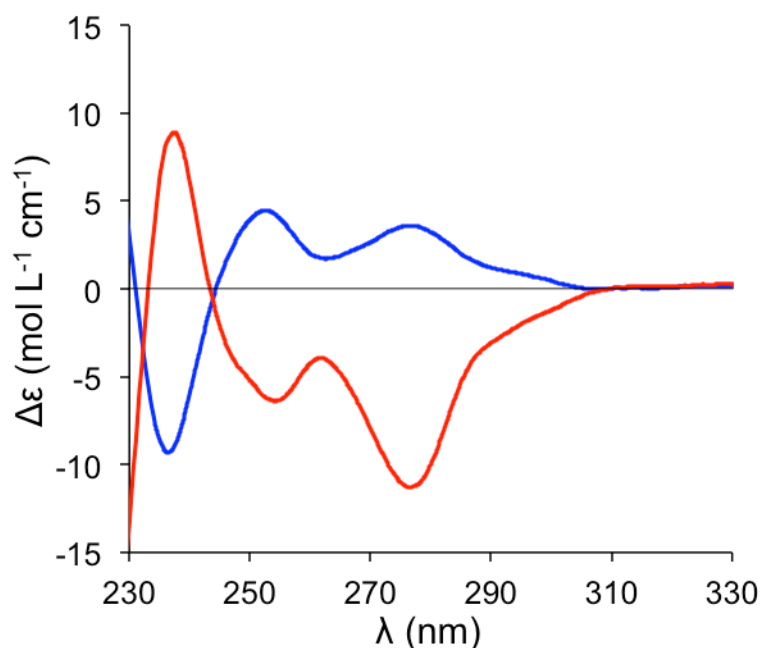

**Fig. ESI-10** CD spectra of *PL-2* (blue) and *ML-2* (red) in  $\text{CH}_2\text{Cl}_2$

### Job Plot

Stock solutions (2.0 mM in  $\text{CD}_3\text{CN}$ ) of *PL-2* and *R-9* were prepared. The required concentration of (*R*)-carnitine in  $\text{CD}_3\text{CN}$  was obtained by addition of a 10  $\mu\text{L}$  aliquot from a 2.0 M stock solution of carnitine dissolved in  $\text{H}_2\text{O}$ . The two stock solutions were mixed in NMR spectroscopy tubes in different ratios. In this way, relative concentrations (molar fraction,  $\alpha$ ) were varied continuously but their sum was kept constant (2.0 mM).  $^1\text{H}$  NMR spectra were recorded for each sample and values of the chemical shifts of the host ( $\delta_{\text{obs}}$ ) were measured. The Job plot was obtained by plotting  $(\delta_{\text{obs}} - \delta_{\text{free}})\alpha$  vs  $\alpha$ , for which  $\delta_{\text{free}}$  is the chemical shift of the proton in the uncomplexed host. The stoichiometry of the complex was obtained from the value of the molar fraction,  $\alpha$ , at which a maximum is observed (i.e.,  $\alpha_{\text{max}} = 0.5$  observed for 1:1 complexation).

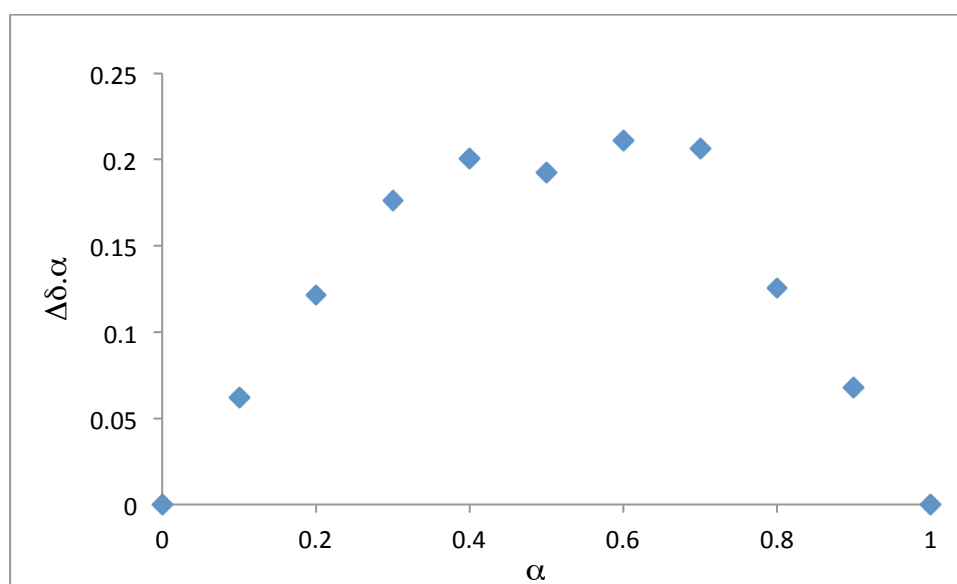

**Fig. ESI-11** Job plot of (*R*)-carnitine *R-9* with host *PL-2*;  $\alpha$  is the host's mole fraction.

## NMR Titrations

All  $^1\text{H}$  NMR titration experiments were performed in  $\text{CD}_3\text{CN}$  (unless otherwise noted) and were conducted according to the following example. Into a solution of hemicryptophane (0.785 mM in  $\text{CD}_3\text{CN}$ , 1000  $\mu\text{L}$ ) in an NMR spectroscopy tube was added sequentially 5  $\mu\text{L}$  aliquots of a solution of carnitine (15.7 mM) and hemicryptophane (0.785 mM) in  $\text{CD}_3\text{CN}$ . In this way the concentration of carnitine increased while keeping the concentration of the hemicryptophane constant. The carnitine/hemicryptophane solution was prepared by addition of a 10  $\mu\text{L}$  aliquot from a 1.57 M stock solution of carnitine in  $\text{H}_2\text{O}$  to a solution of hemicryptophane (0.785 mM) in  $\text{CD}_3\text{CN}$  (1000  $\mu\text{L}$ ). The change in chemical shift ( $\Delta\delta$ ) of the proton signals of the host were measured after each addition and plotted as a function of the guest/host ratio. Association constants  $K_a$  were obtained by nonlinear least-squares fitting of this plot using the WinEQNMR2 program.

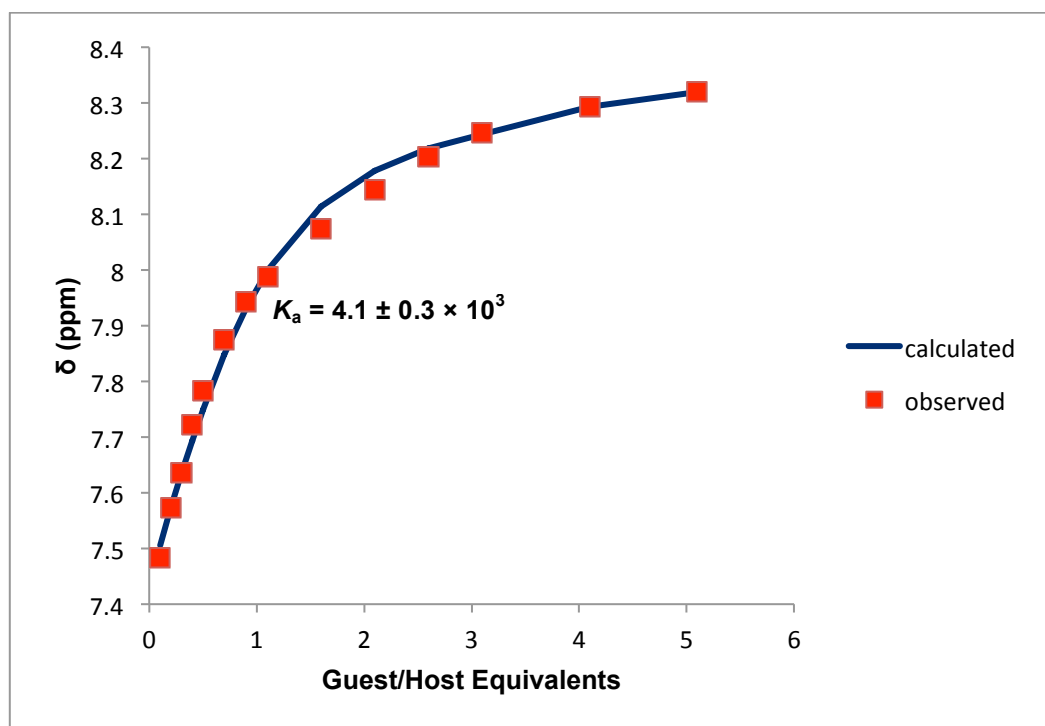

**Fig. ESI-12**  $^1\text{H}$  NMR titration of hemicryptophane *PL-2* with (*R*)-carnitine *R-9*;  $\delta_{\text{NH(Gly)}}$  of *PL-2* as a function of  $[\text{R-9}]/[\text{PL-2}]$  ratio.

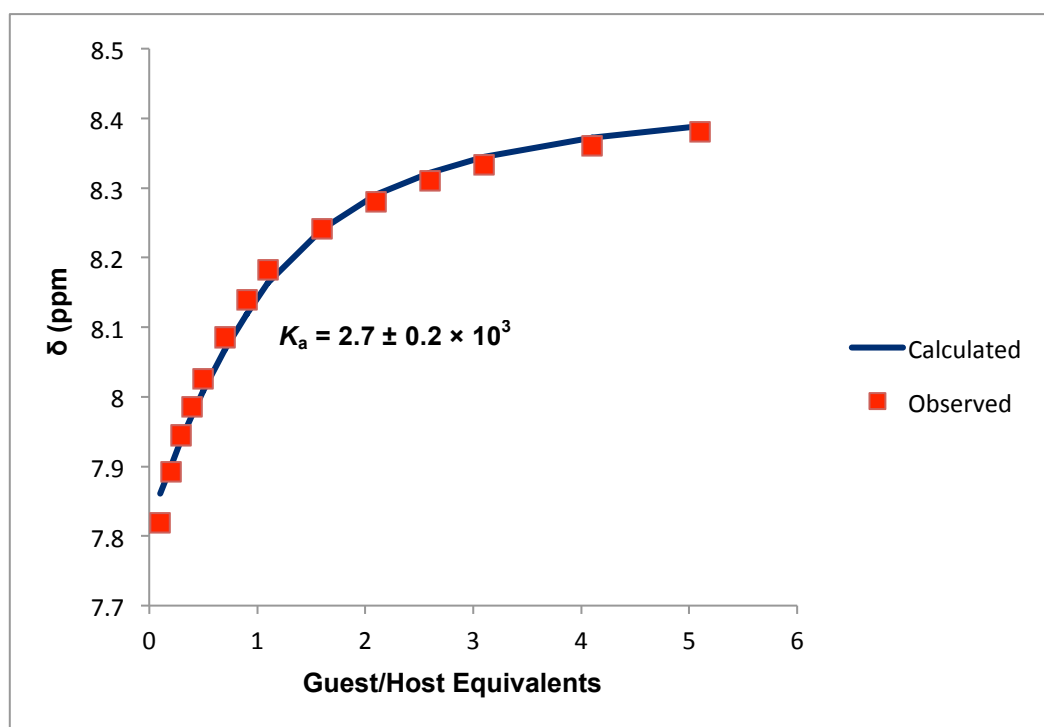

**Fig. ESI-13**  $^1\text{H}$  NMR titration of hemicryptophane *PL-2* with (*S*)-carnitine *S-9*;  $\delta_{\text{NH(Gly)}}$  of *PL-2* as a function of [*S-9*]/[*PL-2*] ratio.

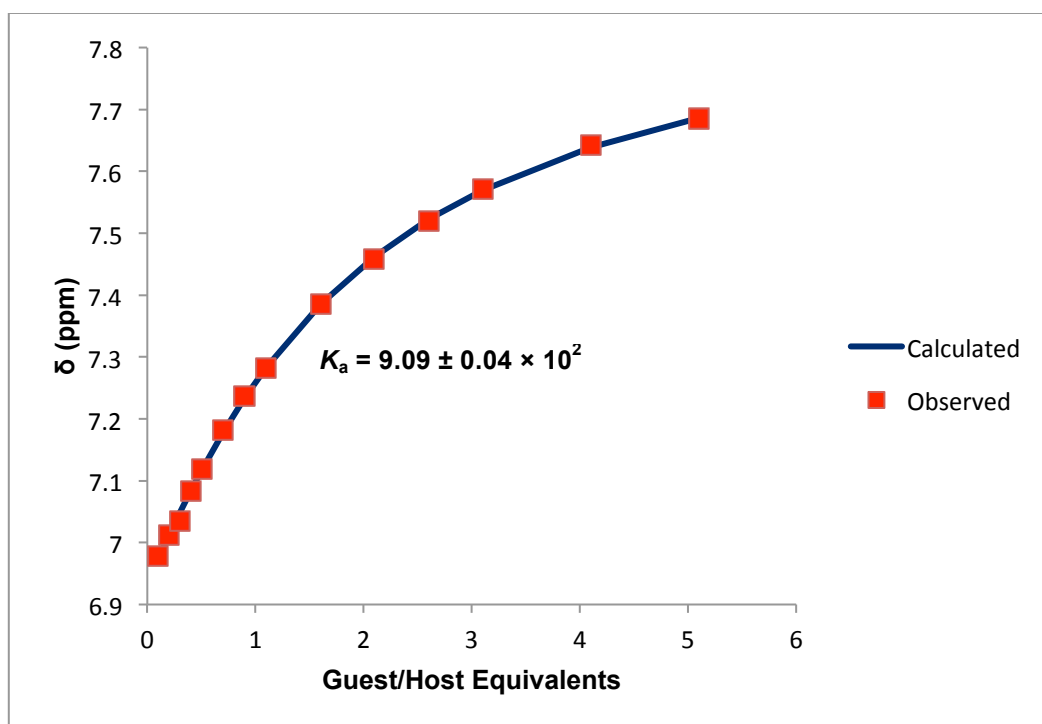

**Fig. ESI-14**  $^1\text{H}$  NMR titration of hemicryptophane *ML-2* with (*R*)-carnitine *R-9*;  $\delta_{\text{NH(Gly)}}$  of *ML-2* as a function of [*R-9*]/[*ML-2*] ratio.

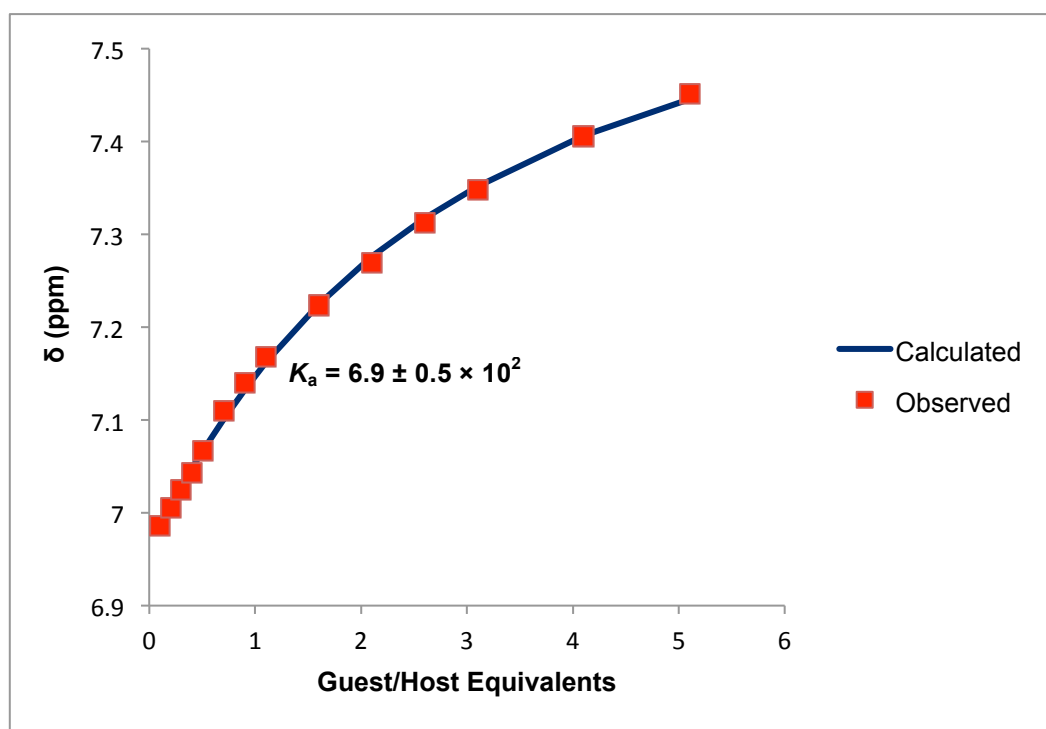

**Fig. ESI-15**  $^1\text{H}$  NMR titration of hemicryptophane *ML-2* with (*S*)-carnitine *S-9*;  $\delta_{\text{NH(Gly)}}$  of *ML-2* as a function of  $[\text{S-9}]/[\text{ML-2}]$  ratio.

**Table ESI-1:**  $K_a$  values determined from  $^1\text{H}$  NMR titrations calculated from shifts of glycyI NH and CTV OMe protons ( $\Delta\delta$  plots for OMe peaks; data not shown).

| Host        | Guest      | $\Delta\delta_{\text{max}}(\text{Gly-NH})$ | $K_a$                     | $\Delta\delta_{\text{max}}(\text{OMe})$ | $K_a$                       |
|-------------|------------|--------------------------------------------|---------------------------|-----------------------------------------|-----------------------------|
| <i>PL-2</i> | <i>R-9</i> | -0.8945                                    | $4.1 \pm 0.3 \times 10^3$ | 0.0265                                  | $4.04 \pm 0.04 \times 10^3$ |
| <i>PL-2</i> | <i>S-9</i> | -0.5937                                    | $2.7 \pm 0.2 \times 10^3$ | 0.0172                                  | $2.61 \pm 0.02 \times 10^3$ |
| <i>ML-2</i> | <i>R-9</i> | -0.7194                                    | $9.1 \pm 0.1 \times 10^2$ | -0.0101                                 | $1.02 \pm 0.01 \times 10^3$ |
| <i>ML-2</i> | <i>S-9</i> | -0.4791                                    | $6.9 \pm 0.5 \times 10^2$ | -0.0034                                 | $6.37 \pm 0.04 \times 10^2$ |

Control binding experiments were conducted with cyclic peptide c(GYGYGY) **6** to confirm the ditopic binding of **9** with hemicryptophane *PL-2*. <sup>1</sup>H NMR titrations were conducted in d<sub>6</sub>-DMSO as **6** was insoluble in CD<sub>3</sub>CN. Binding of hemicryptophane *PL-2* with (*R*)-carnitine **9** was also determined in d<sub>6</sub>-DMSO. The solutions were prepared in the same manner as described above.

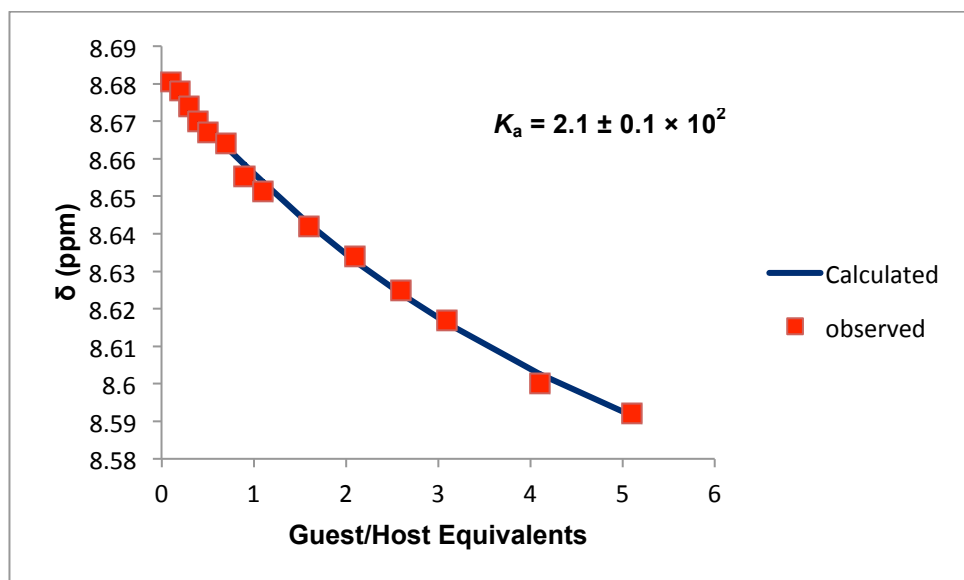

**Fig. ESI-16** <sup>1</sup>H NMR titration of cyclic peptide **6** with carnitine *R*-**9** in d<sub>6</sub>-DMSO;

$\delta_{\text{NH(Gly)}}$  of **6** as a function of  $[R-9]/[6]$  ratio.  $K_a = 2.1 \pm 0.1 \times 10^2$

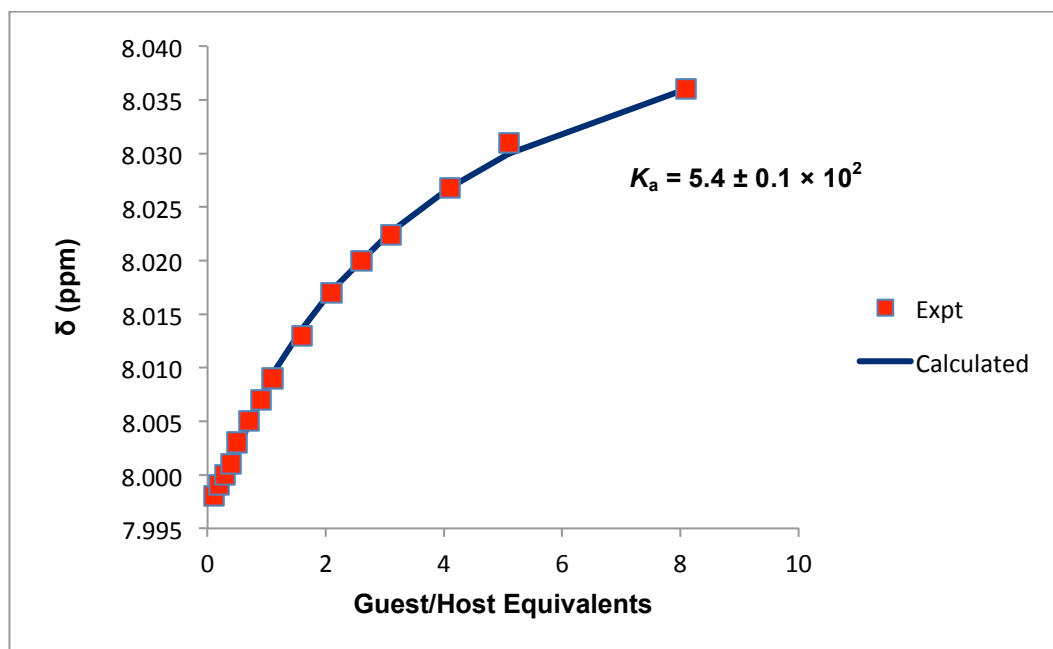

**Fig. ESI-17** <sup>1</sup>H NMR titration of hemicryptophane *PL-2* with (*R*)-carnitine *R*-**9** d<sub>6</sub>-DMSO;

$\delta_{\text{NH(Gly)}}$  of *PL-2* as a function of  $[R-9]/[PL-2]$  ratio.  $K_a = 5.4 \pm 0.1 \times 10^2$

Linear deprotected peptide 4 (400 MHz, DMSO-*d*<sub>6</sub>). Method B

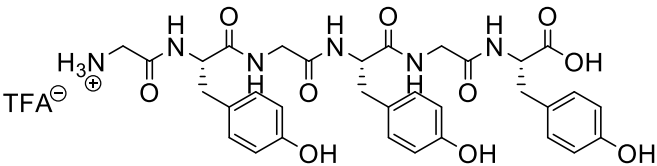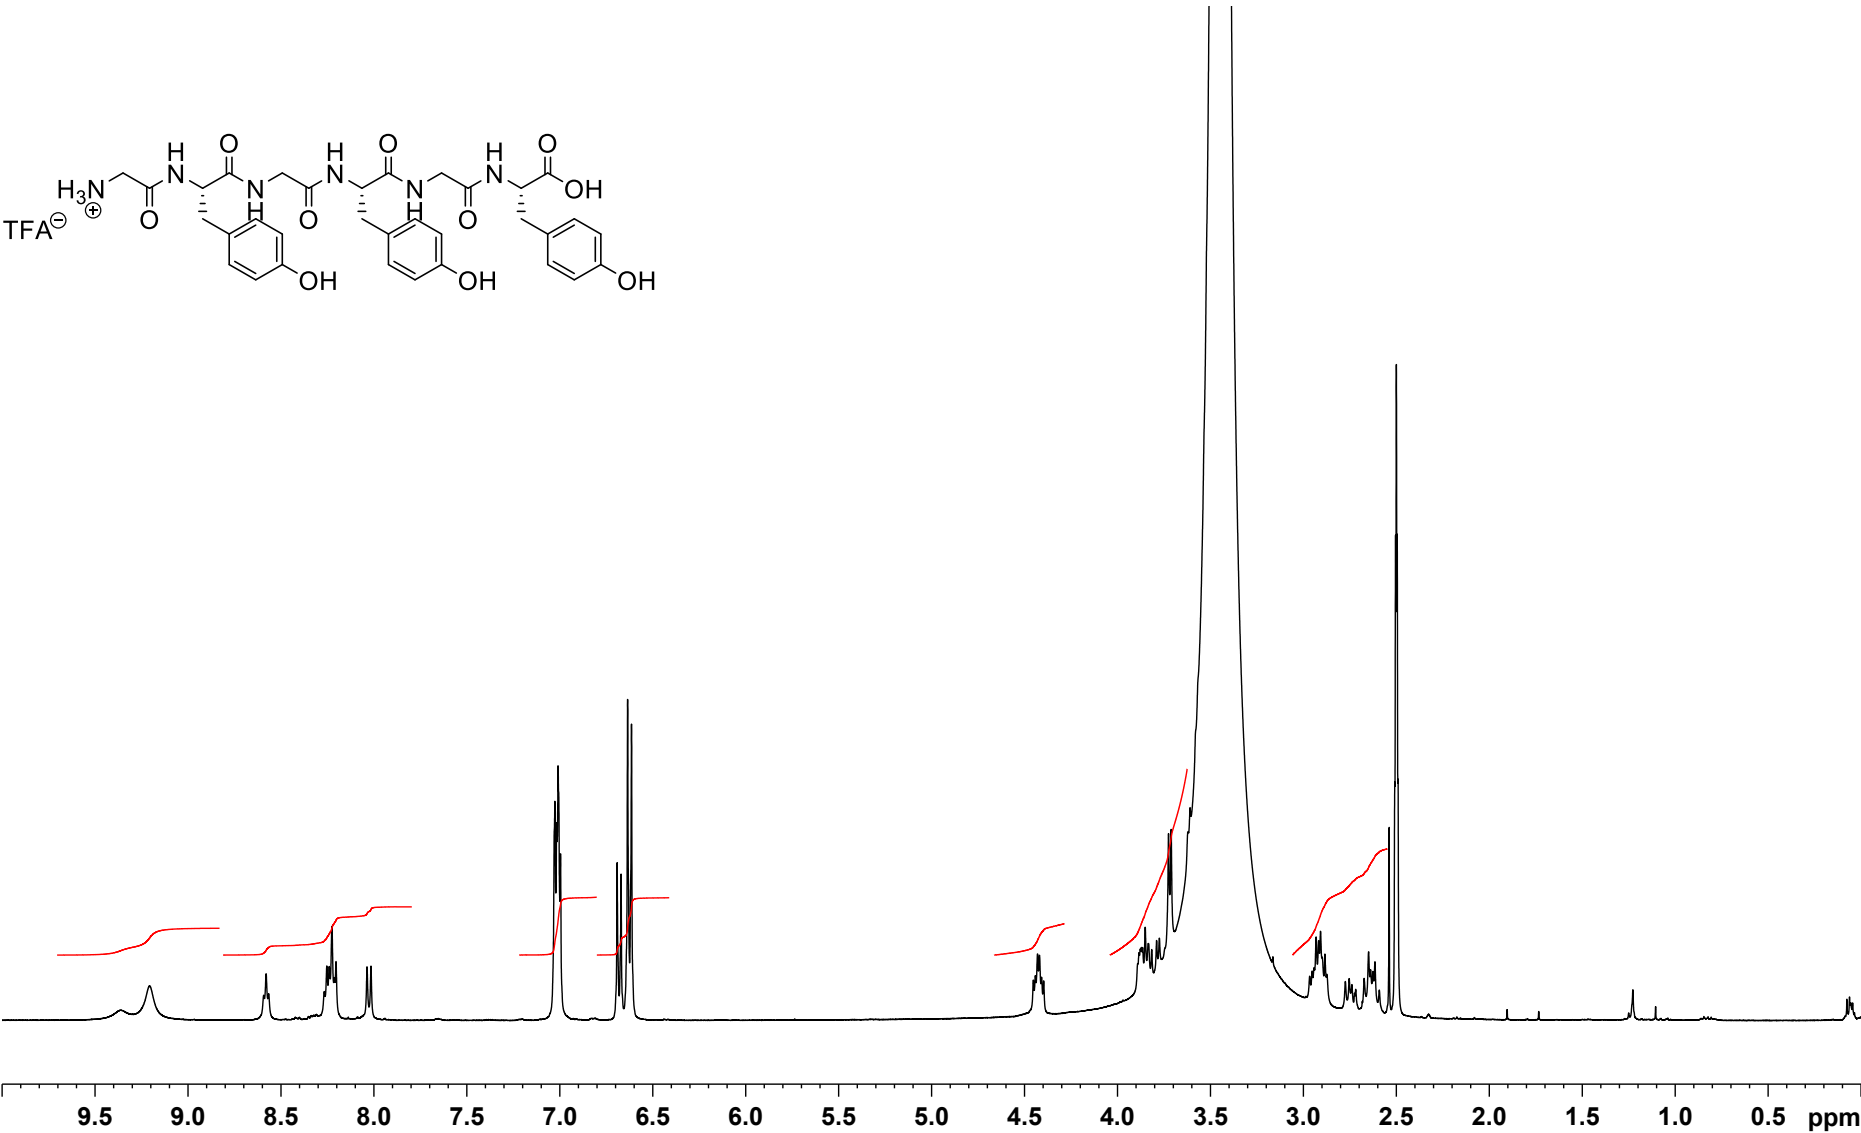

Linear deprotected peptide4 (100 MHz, DMSO-*d*<sub>6</sub>). Method B

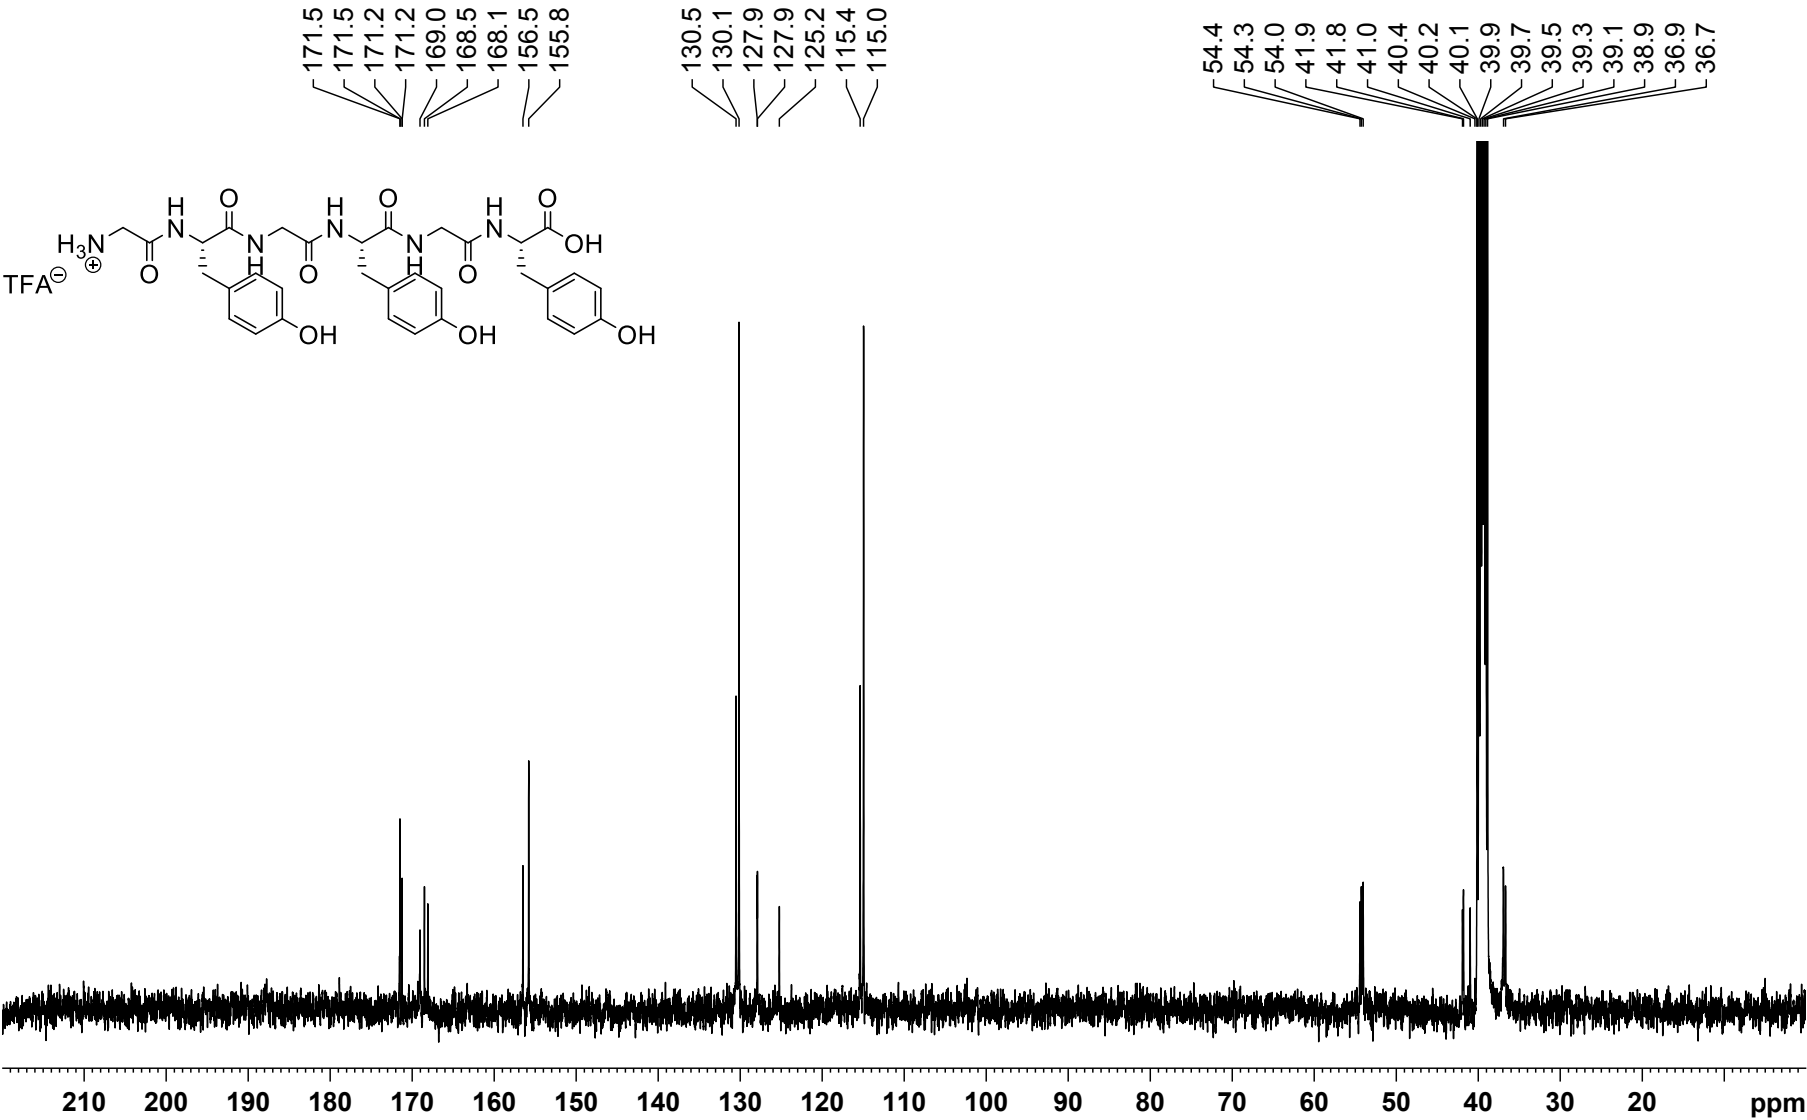

**Cyclic hexapeptide c(YGYGYG) 6 (500 MHz, DMSO- $d_6$ ). Method A**

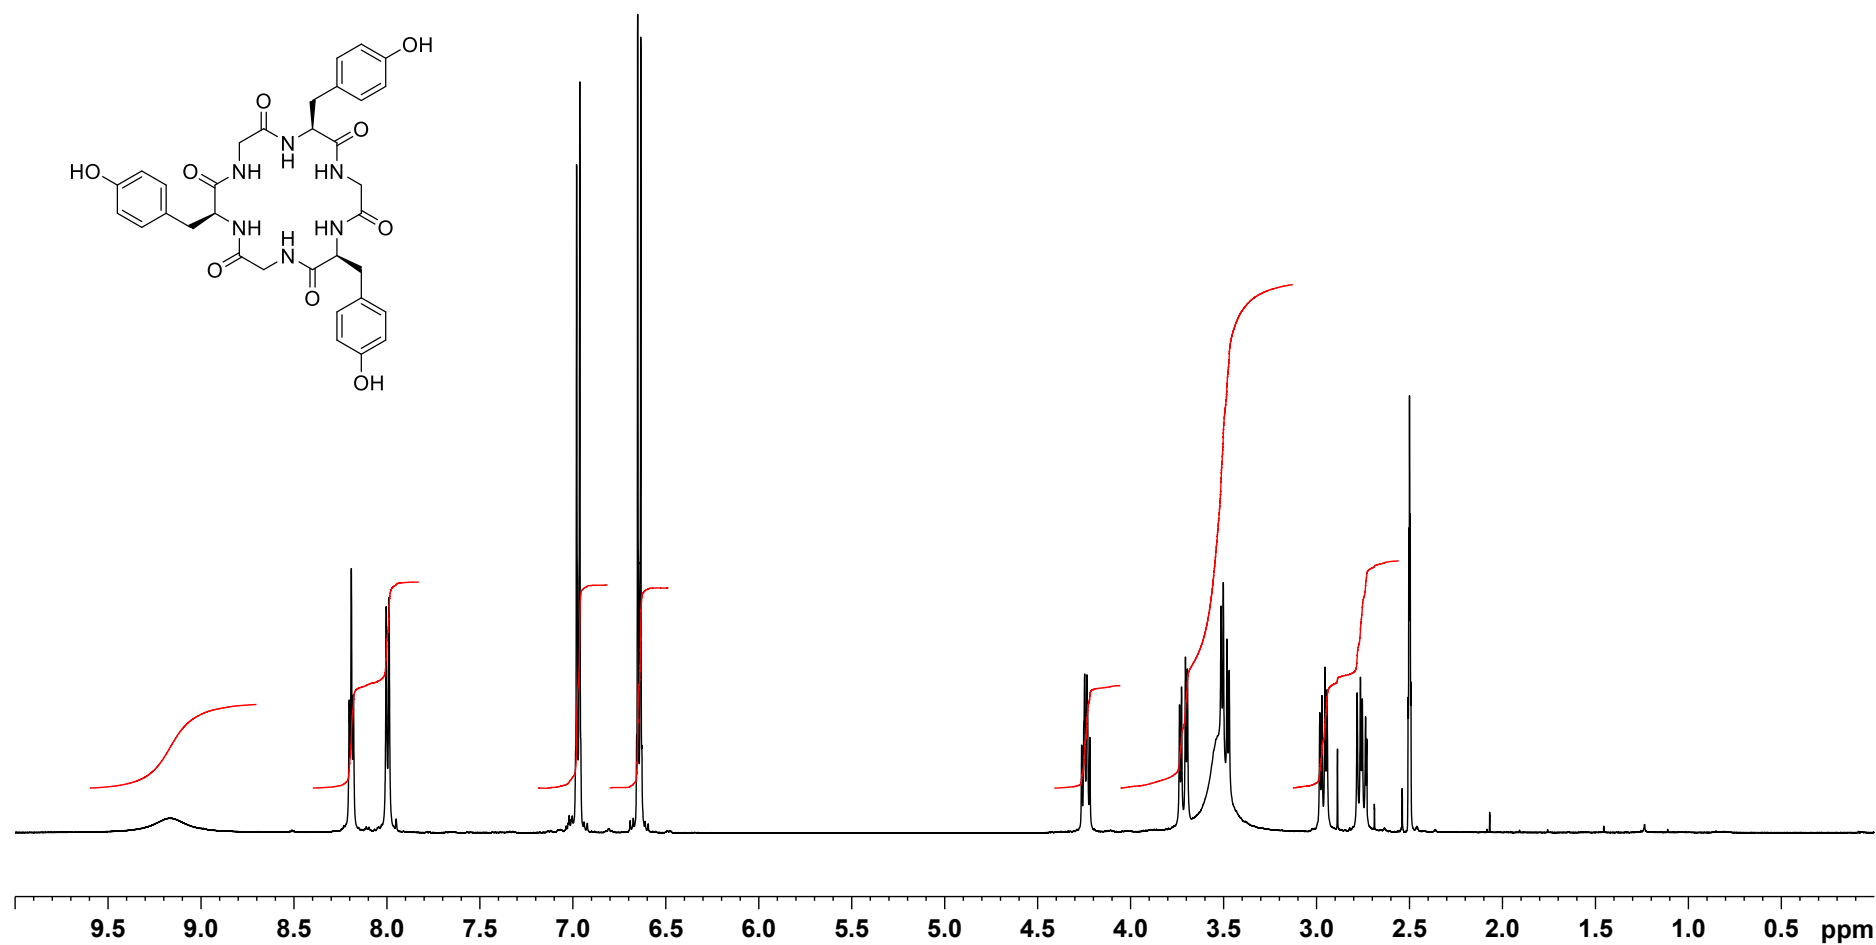

Cyclic hexapeptide c(YGYGYG) 6 (125 MHz, DMSO-*d*<sub>6</sub>). Method A

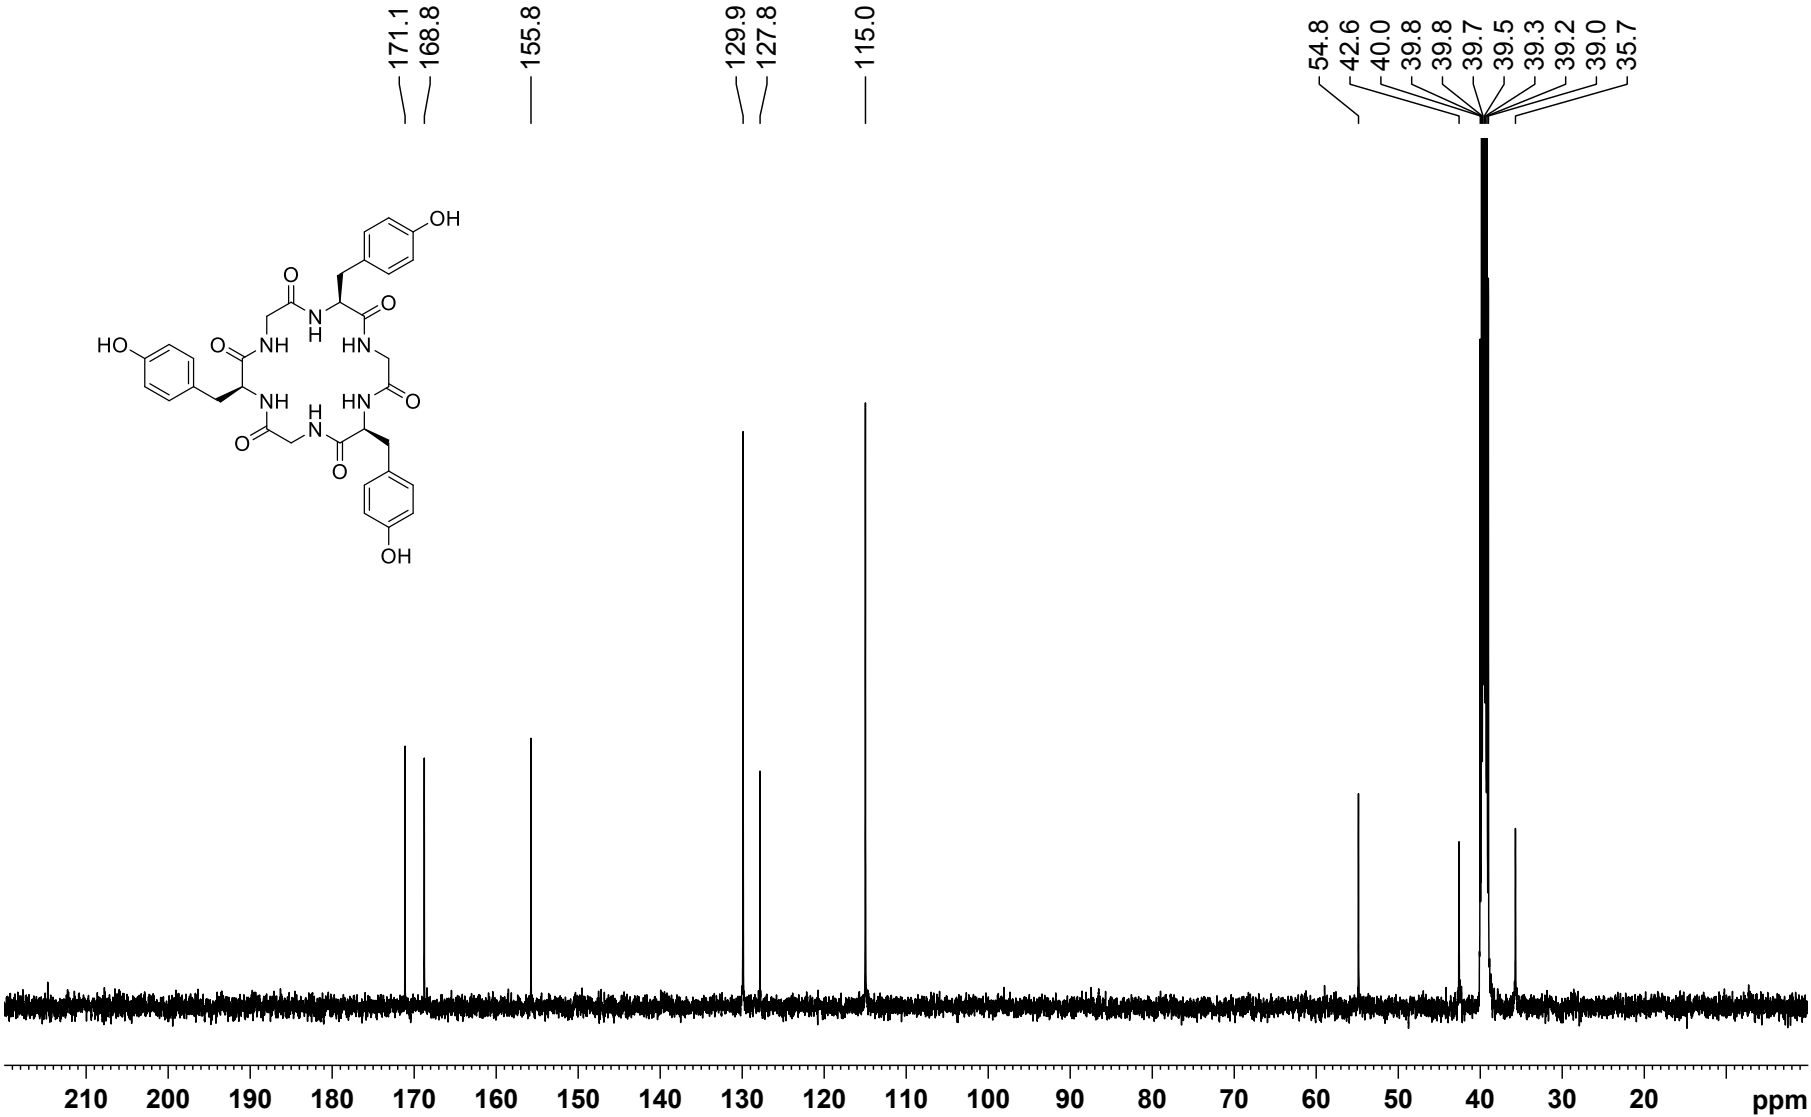

Tris-vanillyl cyclic peptide 8 (500 MHz, DMSO-*d*<sub>6</sub>)

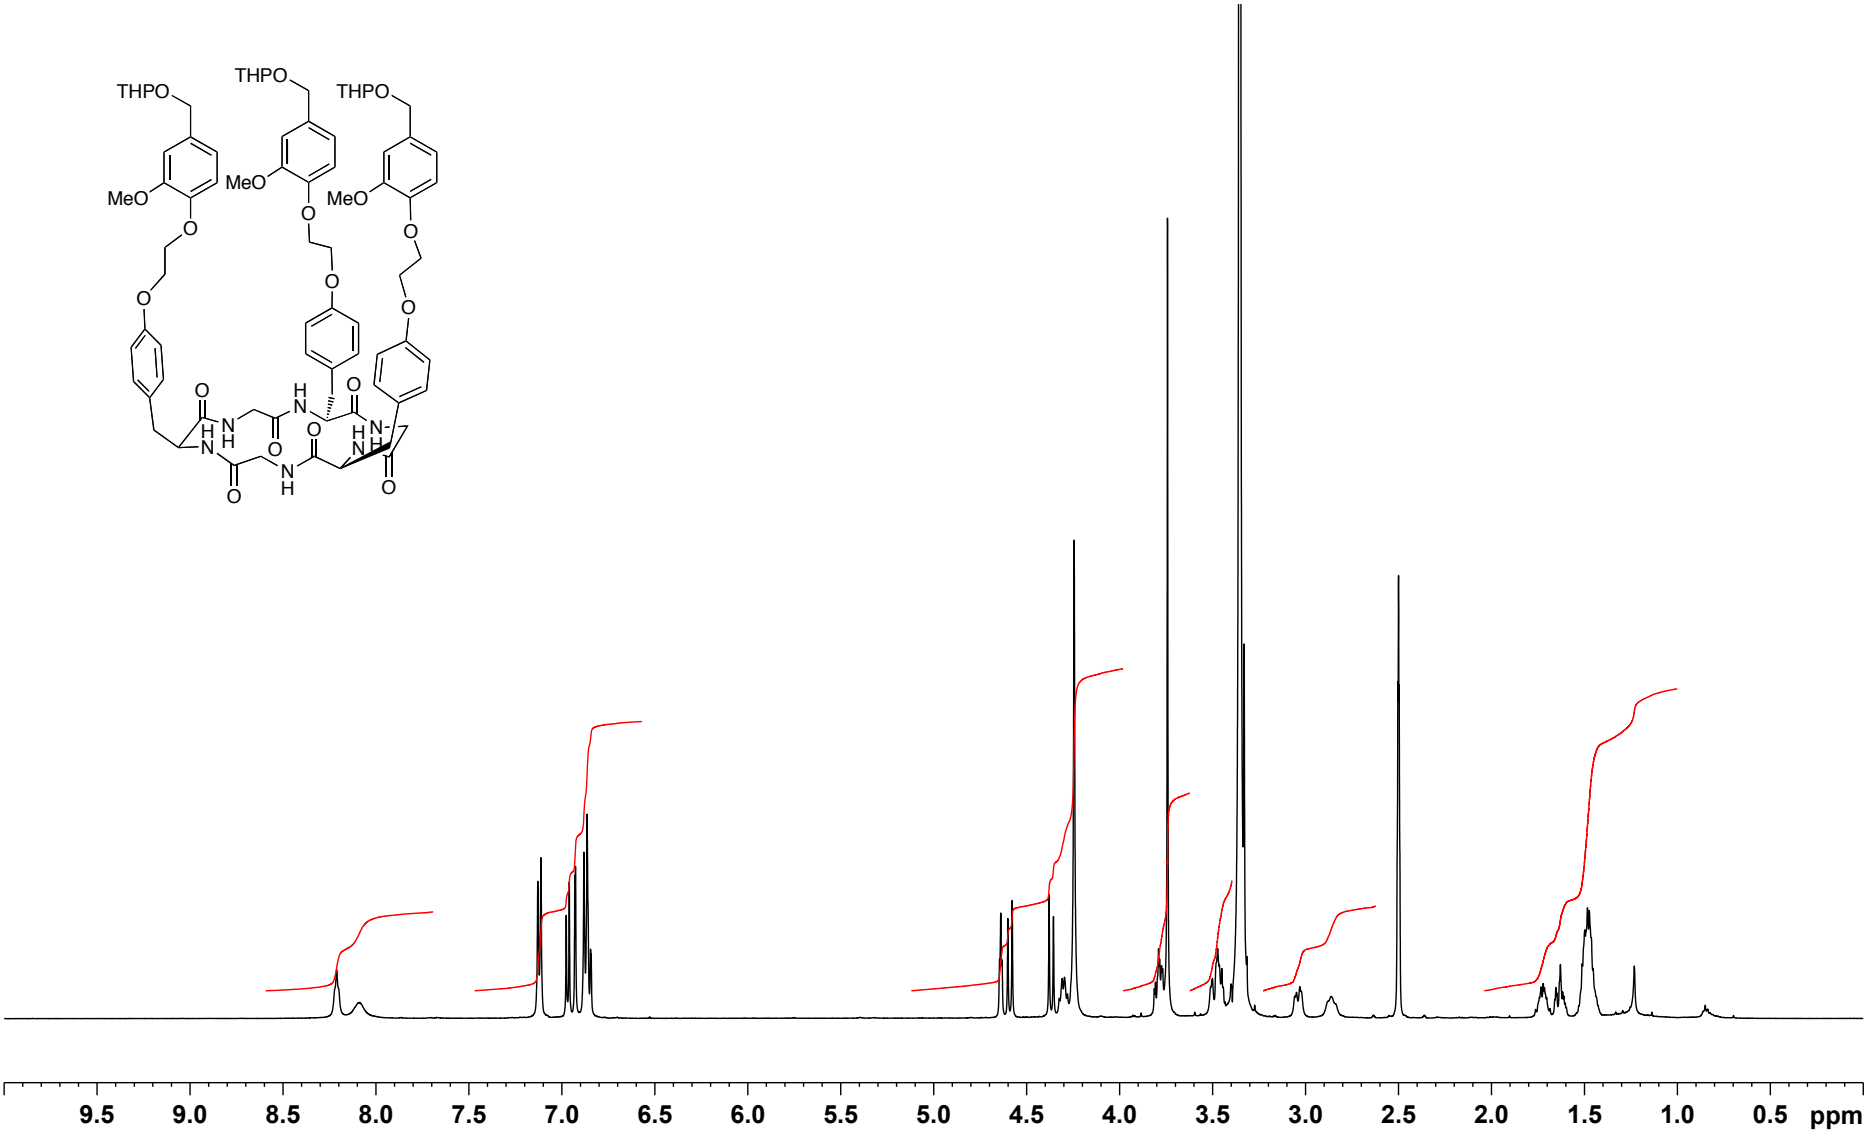

Tris-vanillyl cyclic peptide 8 (500 MHz, DMSO-*d*<sub>6</sub>)

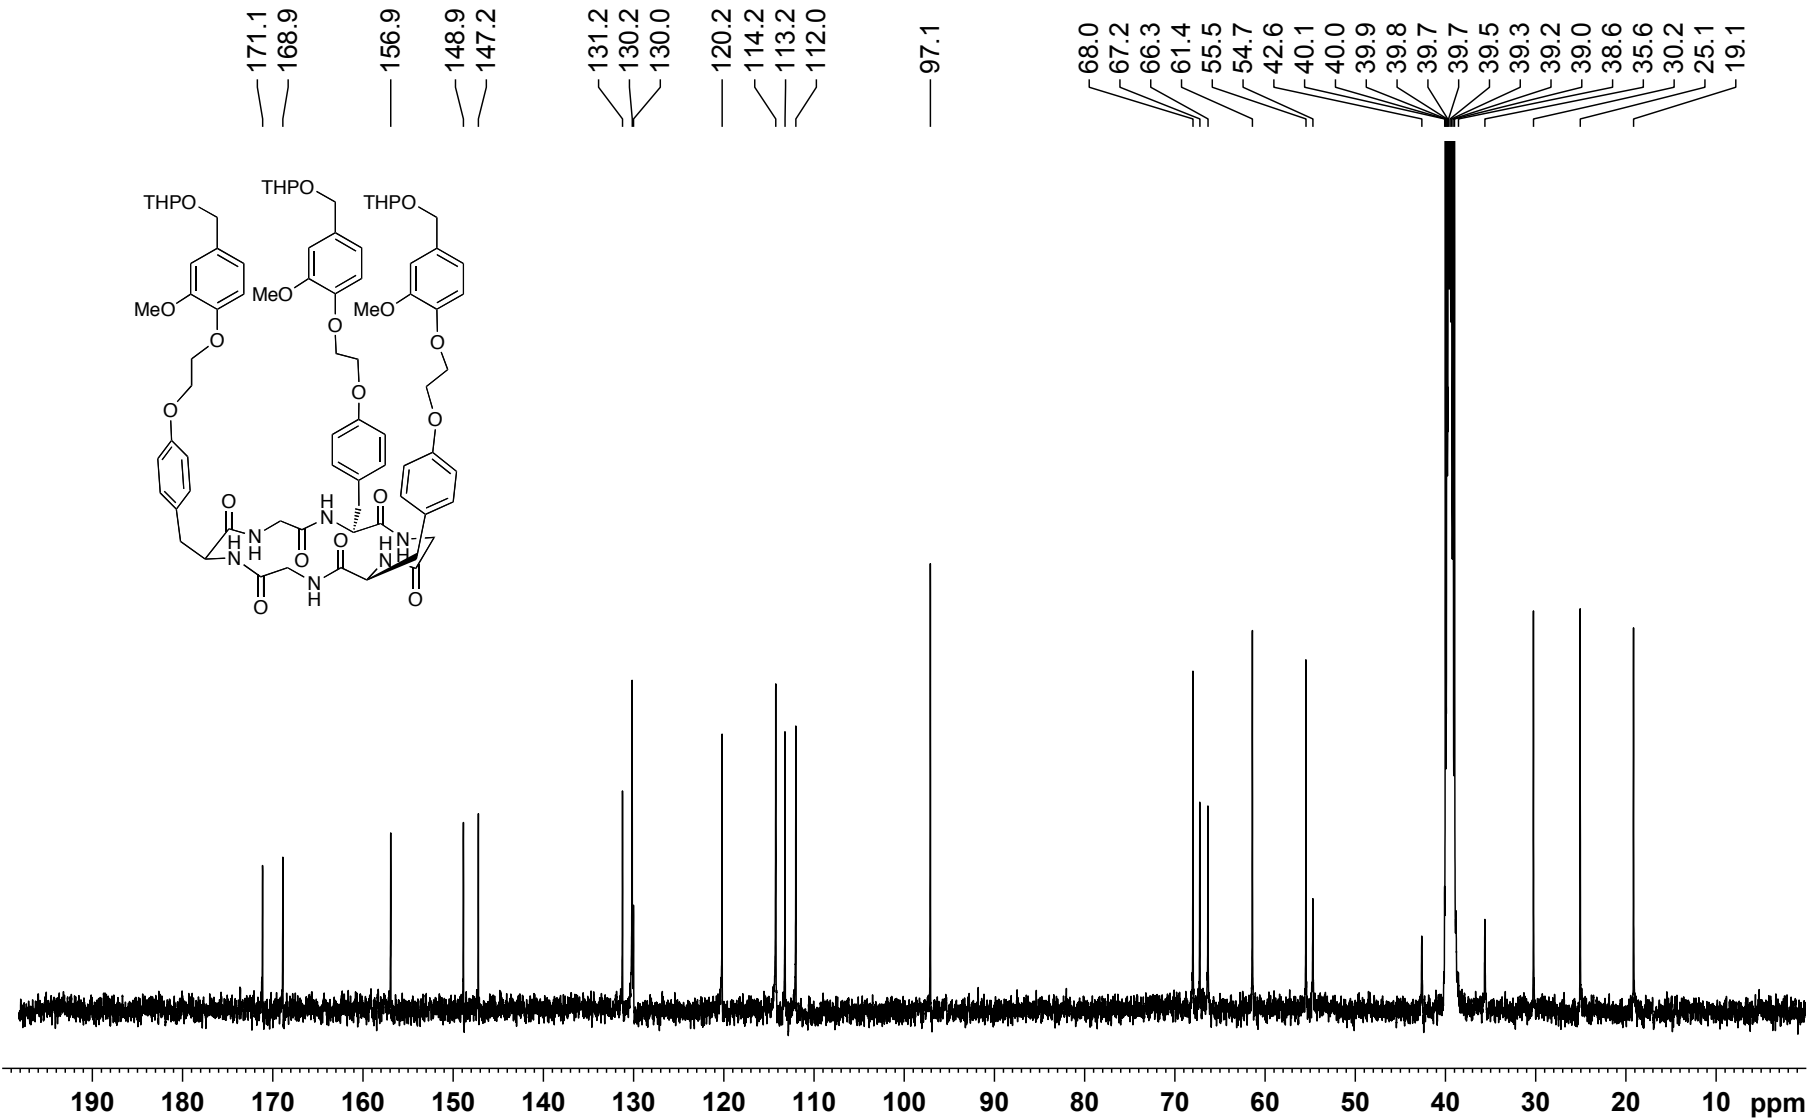

Tris-vanillyl cyclic peptide 8 (500 MHz, DMSO-*d*<sub>6</sub>)

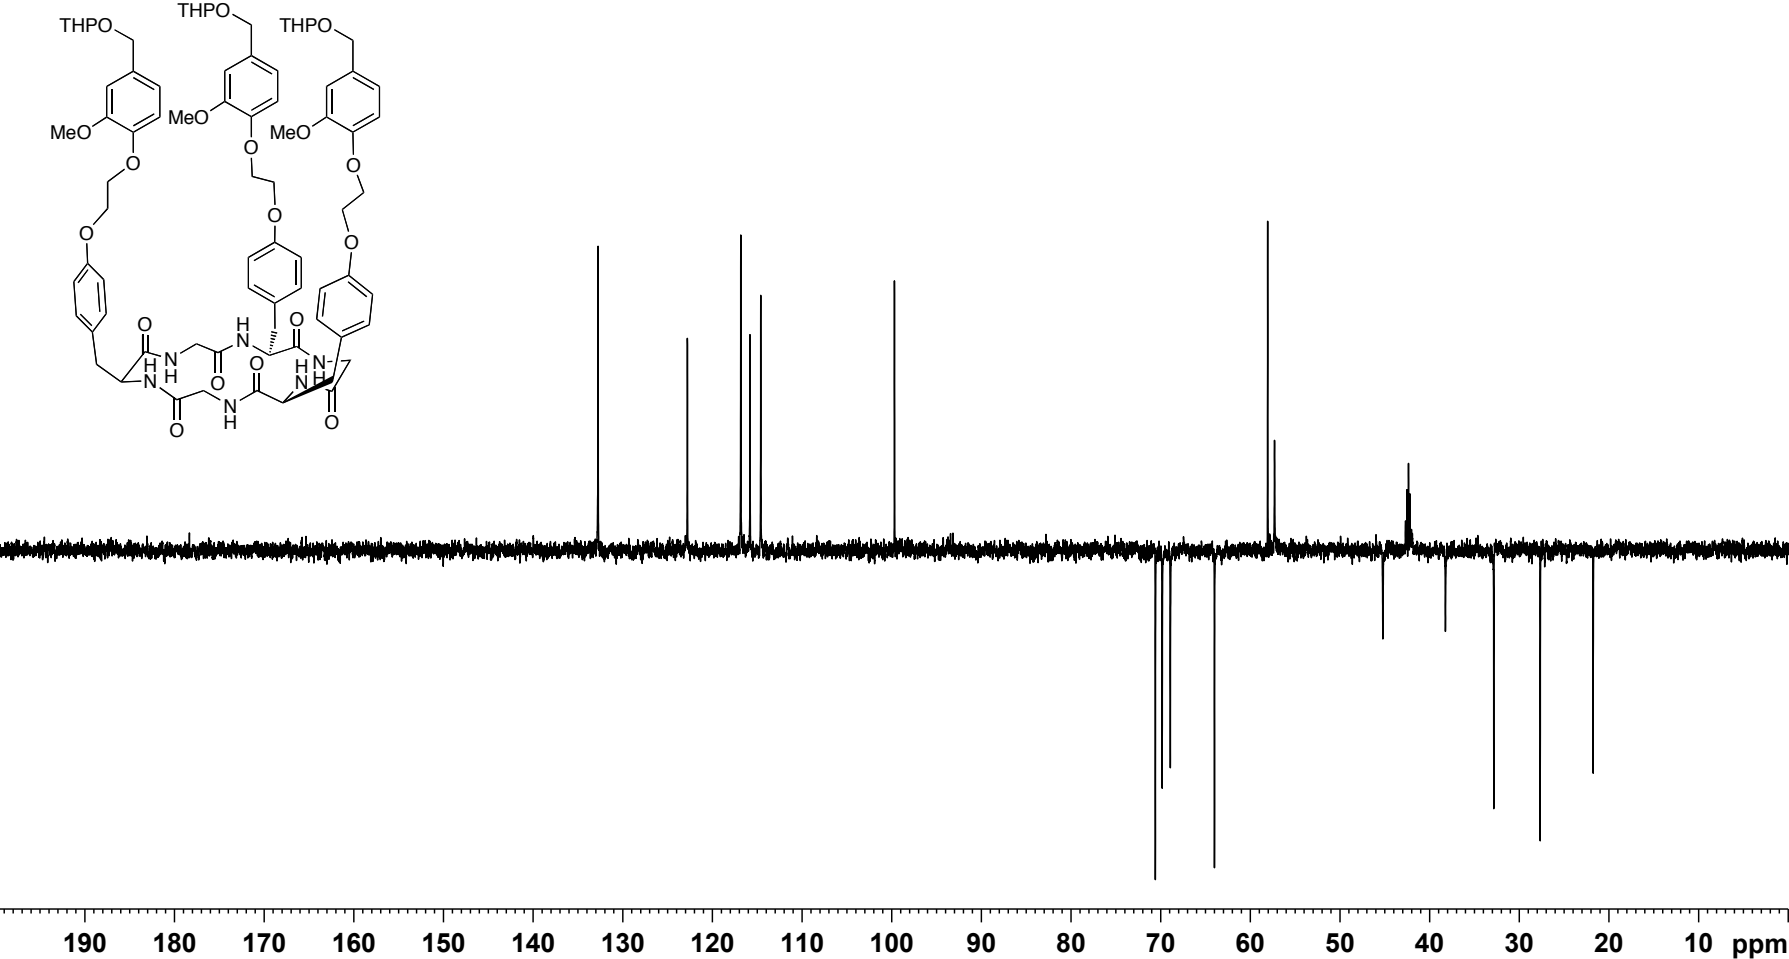

Hemicryptophane *PL-2* (500 MHz, acetone-*d*<sub>6</sub>)

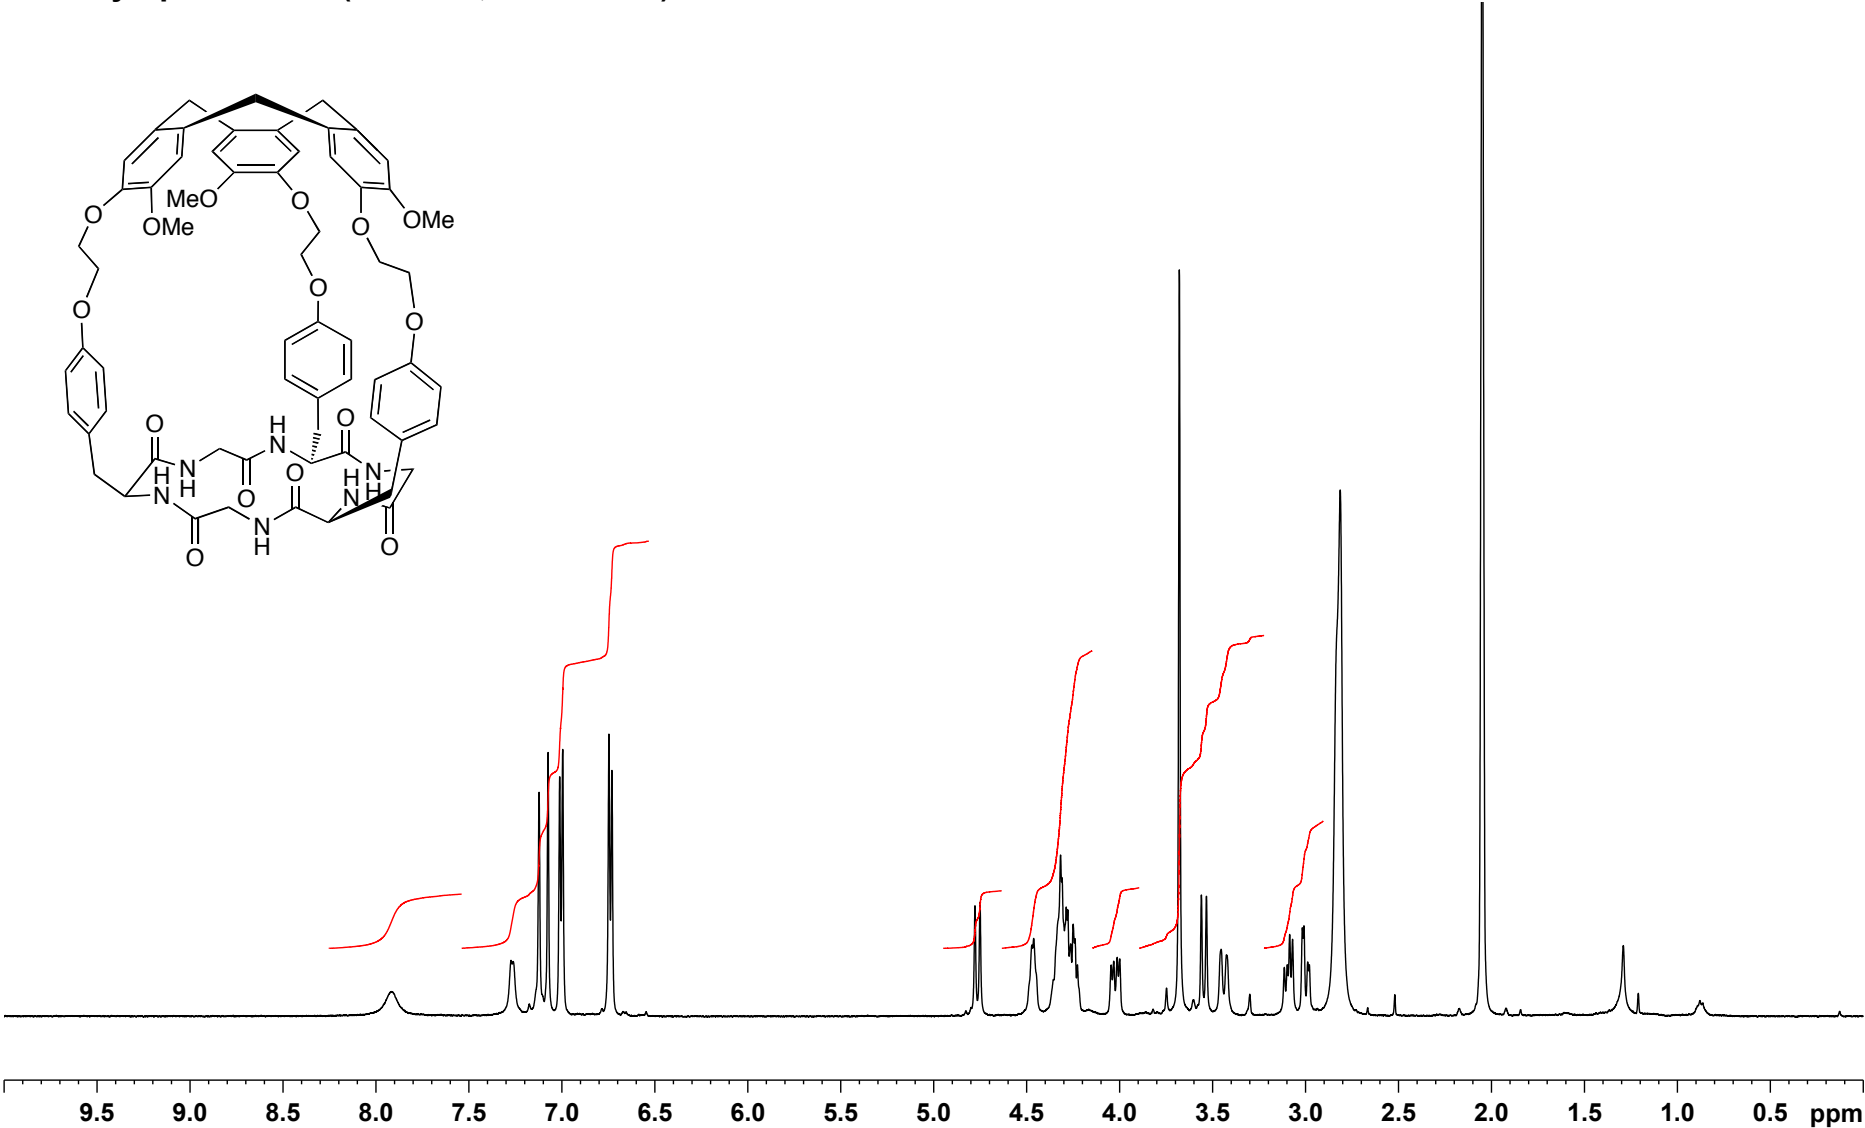

Hemicryptophane *PL-2* (500 MHz, CD<sub>3</sub>CN)

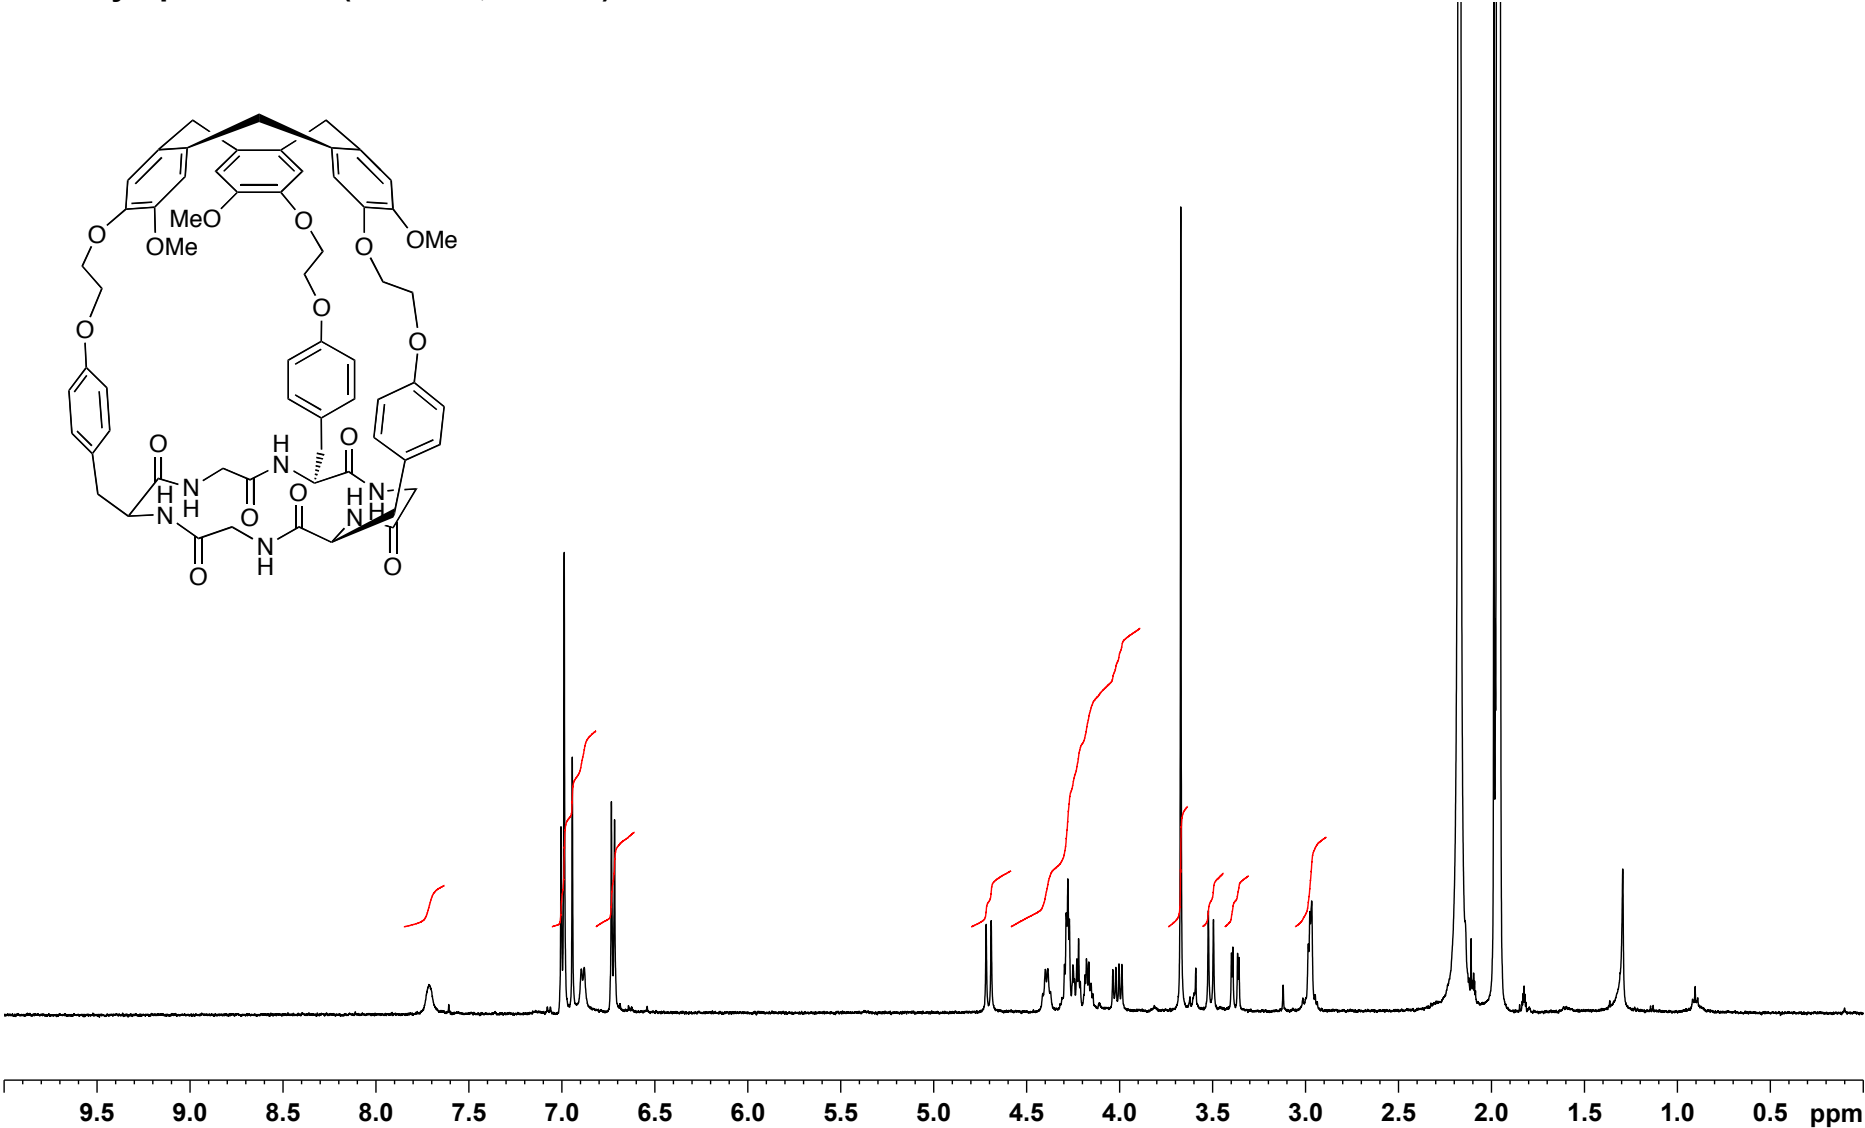

Hemicryptophane *PL-2* (125 MHz, acetone-*d*<sub>6</sub>)

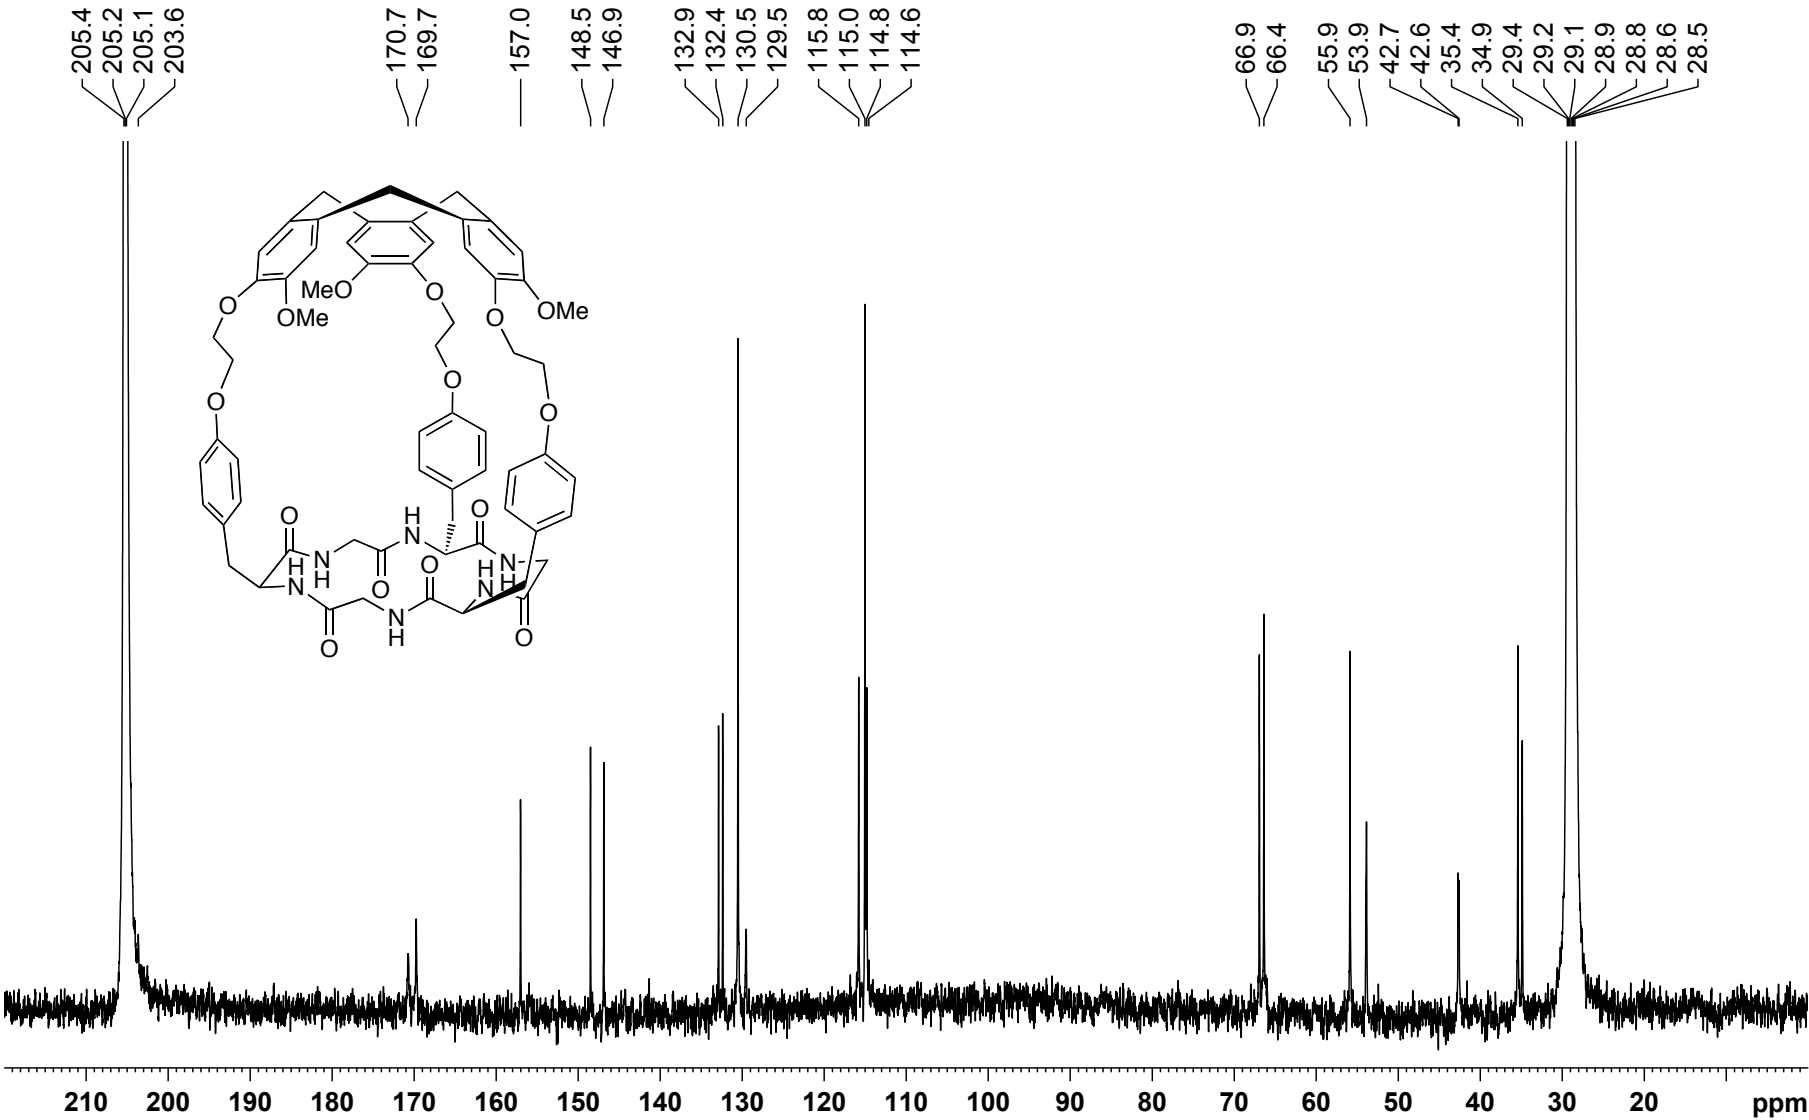

# Hemicryptophane *PL-2* (125 MHz, acetone-*d*<sub>6</sub>) COSY

## Current Data Parameters

NAME 13-2bigcosy2.fid  
EXPNO 2  
PROCNO 1

## F1 - Acquisition parameters

TD 148  
SFO1 500.2026 MHz  
FIDRES 33.798573 Hz  
SW 10.000 ppm  
FnMODE undefined

## F2 - Processing parameters

SI 1024  
SF 500.2002002 MHz  
WDW QSINE  
SSB 0  
LB 0 Hz  
GB 0  
PC 1.40

## F1 - Processing parameters

SI 256  
MC2 QF  
SF 500.2001884 MHz  
WDW  
SSB 0  
LB 0 Hz  
GB 0

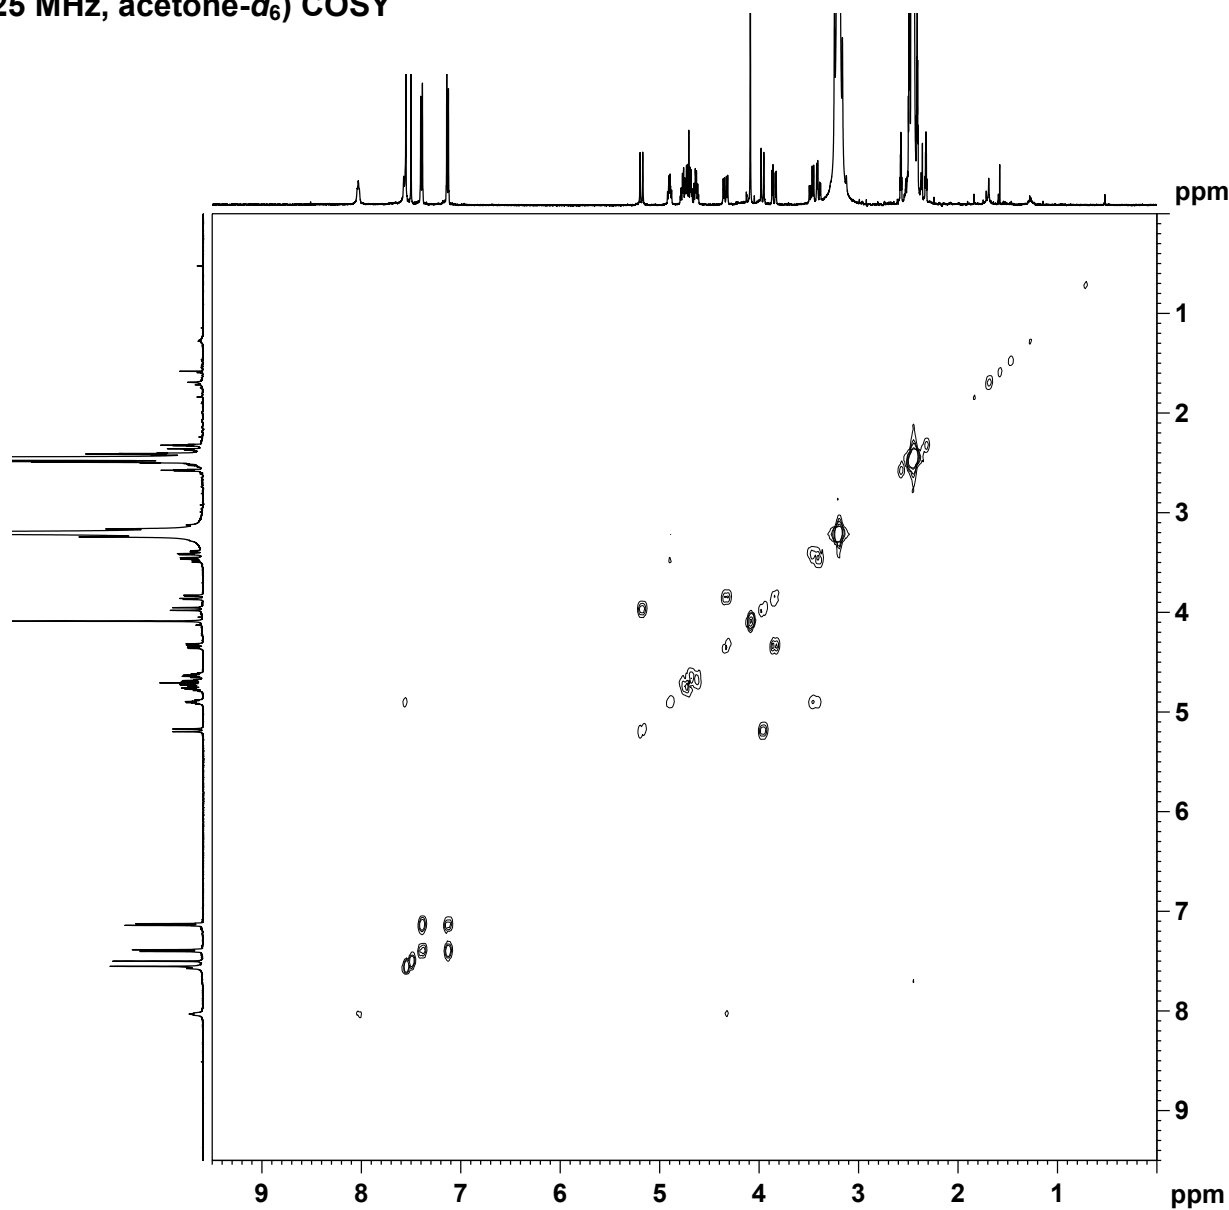

Hemicryptophane *PL-2* (125 MHz, acetone-*d*<sub>6</sub>) HSQC

```
=====
Date_      2011/11/13
Time       14.04
INSTRUM    spect
PROBHD     5 mm CPTXI 1H-
PULPROG    hsgcsetgp
TD          4096
SOLVENT    Acetone
NS          64
DS          16
SWH         7002.801 Hz
FIDRES     1.709668 Hz
AQ          0.2925044 sec
RG          11585.2
DW          71.400 usec
DE          10.00 usec
TE          310.1 K
CNST2      145.0000000
D0          0.00000300 sec
D1          1.50000000 sec
D4          0.00172414 sec
D11         0.03000000 sec
D13         0.00000400 sec
D16         0.00020000 sec
IN0         0.00001990 sec
ZGPTNS

===== CHANNEL f1 =====
NUC1        1H
F1           8.80 usec
P2          17.60 usec
P28         0 usec
PL1         5.50 dB
PL1W        -1.0#IND0000 W
SFO1        499.6830042 MHz

===== CHANNEL f2 =====
CPDPRG2     garp
NUC2        13C
F3          15.00 usec
P4          30.00 usec
PCPD2       65.00 usec
PL2         -0.30 dB
PL12        12.44 dB
PL2W        -1.0#IND0000 W
PL12W       -1.0#IND0000 W
SFO2        125.6572005 MHz

===== GRADIENT CHANNEL =====
GPNAM1      SINE.100
GPNAM2      SINE.100
GPZ1        80.00 %
GPZ2        20.10 %
P16         1000.00 usec

F1 - Acquisition parameters
TD           512
SFO1         125.6572 MHz
FIDRES       49.084843 Hz
SW           200.000 ppm
FnMODE       Echo-Antiecho

F2 - Processing parameters
SI           1024
SF           499.6800044 MHz
WDW          QSINE
SSB          0
LB           0 Hz
GB           0
PC           1.40

F1 - Processing parameters
SI           1024
MC2          echo-antiecho
SF           125.6445279 MHz
WDW          SINE
SSB          0
LB           0 Hz
GB           0
```

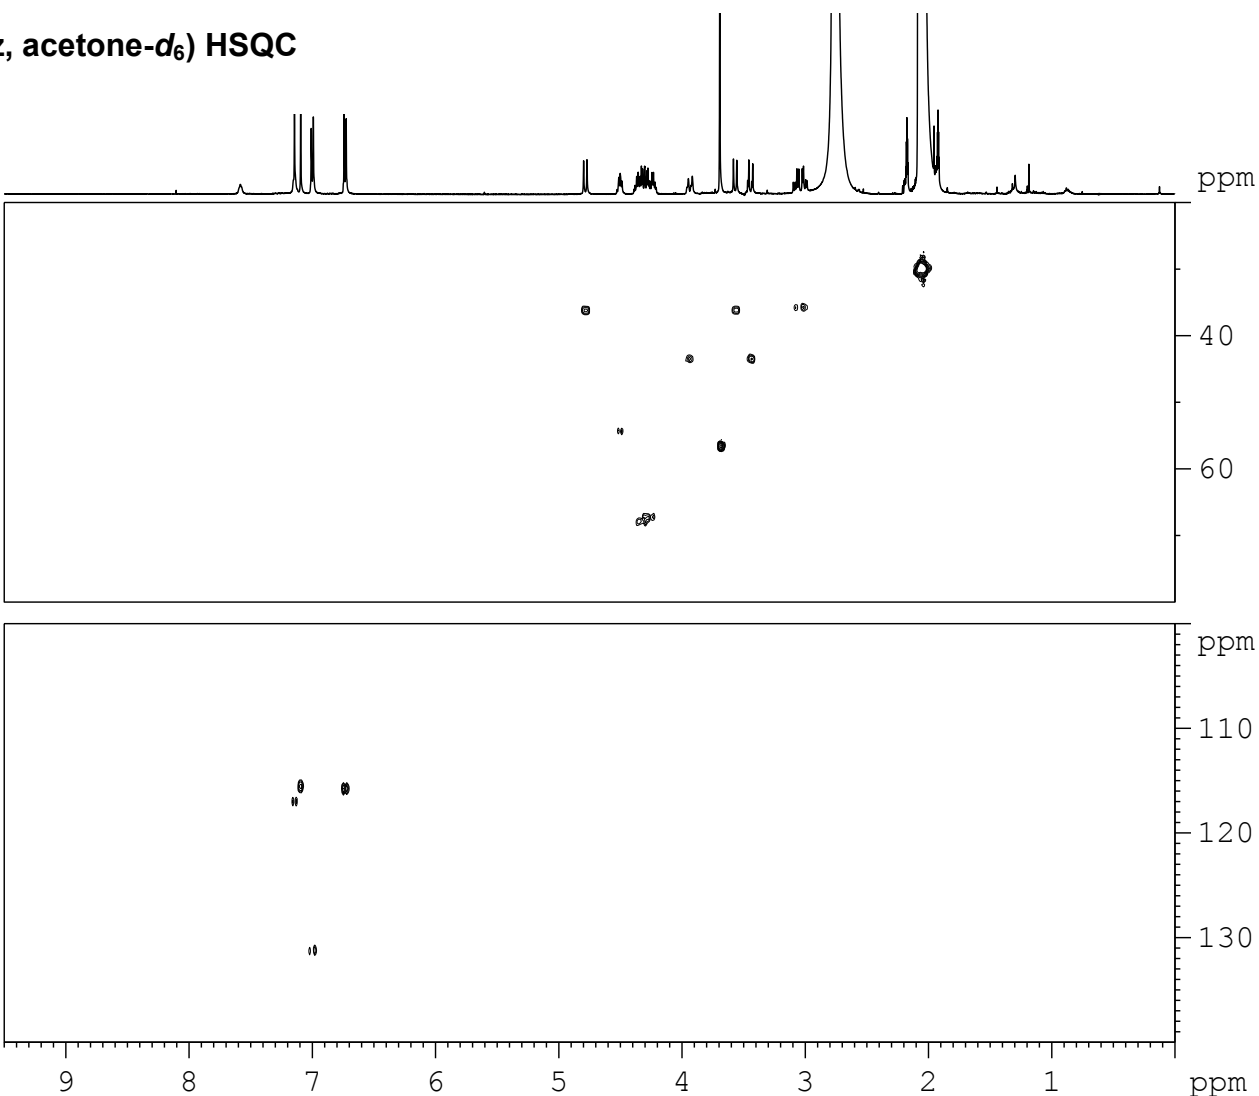

Hemicryptophane *PL-2* (125 MHz, acetone-*d*<sub>6</sub>) HMBC

Current Data Parameters  
NAME 13-2-5-6\_15072011  
EXPNO 3  
PROCNO 1

F2 - Acquisition Parameters  
Date\_ 20110716  
Time\_ 6.35  
INSTRUM spect  
PROBHD 5 mm CPTXI 1H-  
PULPROG hmbcgp1pndqf  
TD 4096  
SOLVENT Acetone  
NS 128  
DS 16  
SWH 7002.801 Hz  
FIDRES 1.709668 Hz  
AQ 0.2925044 sec  
RG 11585.2  
DW 71.400 usec  
DE 10.00 usec  
TE 310.1 K  
CNST2 145.0000000  
CNST13 10.0000000  
D0 0.00000300 sec  
D1 1.50000000 sec  
D2 0.00344828 sec  
D6 0.05000000 sec  
D16 0.00020000 sec  
IN0 0.00001810 sec

===== CHANNEL f1 =====  
NUC1 1H  
P1 8.80 usec  
P2 17.60 usec  
PL1 5.50 dB  
PL1W -1.#IND0000 W  
SFO1 499.6834978 MHz

===== CHANNEL f2 =====  
NUC2 13C  
P3 15.00 usec  
PL2 -0.30 dB  
PL2W -1.#IND0000 W  
SFO2 125.6572005 MHz

===== GRADIENT CHANNEL =====  
GPNAM1 SINE.100  
GPNAM2 SINE.100  
GPNAM3 SINE.100  
GPZ1 50.00 %  
GPZ2 30.00 %  
GPZ3 40.10 %  
P16 1000.00 usec

F1 - Acquisition parameters  
TD 512  
SFO1 125.6572 MHz  
FIDRES 53.993328 Hz  
SW 220.000 ppm  
FnMODE QF

F2 - Processing parameters  
SI 2048  
SF 499.6800062 MHz  
WDW QSINE  
SSB 0  
LB 0 Hz  
GB 0  
PC 1.40

F1 - Processing parameters  
SI 1024  
MC2 QF  
SF 125.6445003 MHz  
WDW SINE  
SSB 0  
LB 0 Hz  
GB 0

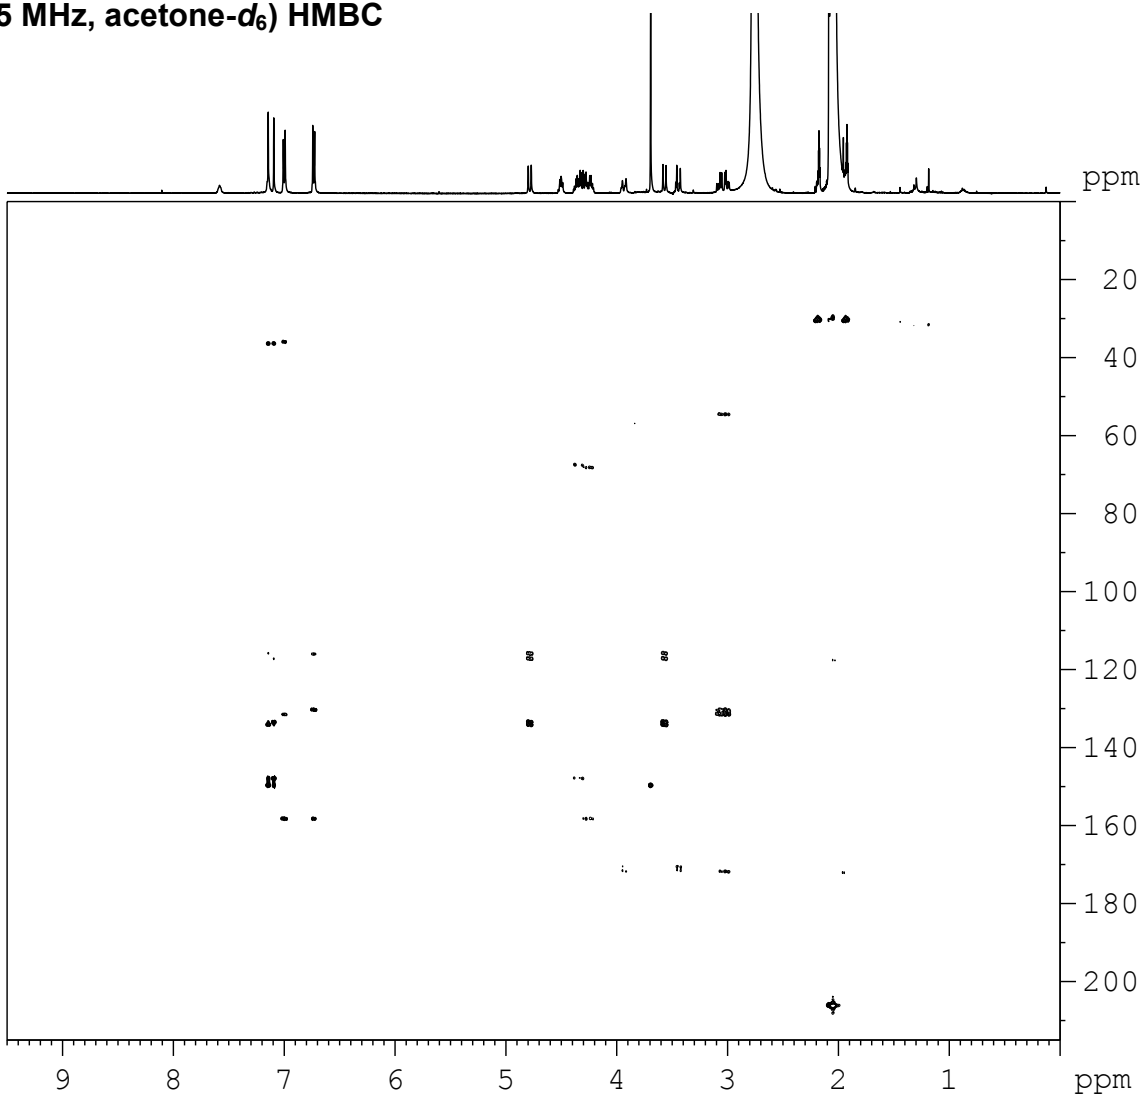

Hemicryptophane *ML-2* (500 MHz, acetone-*d*<sub>6</sub>)

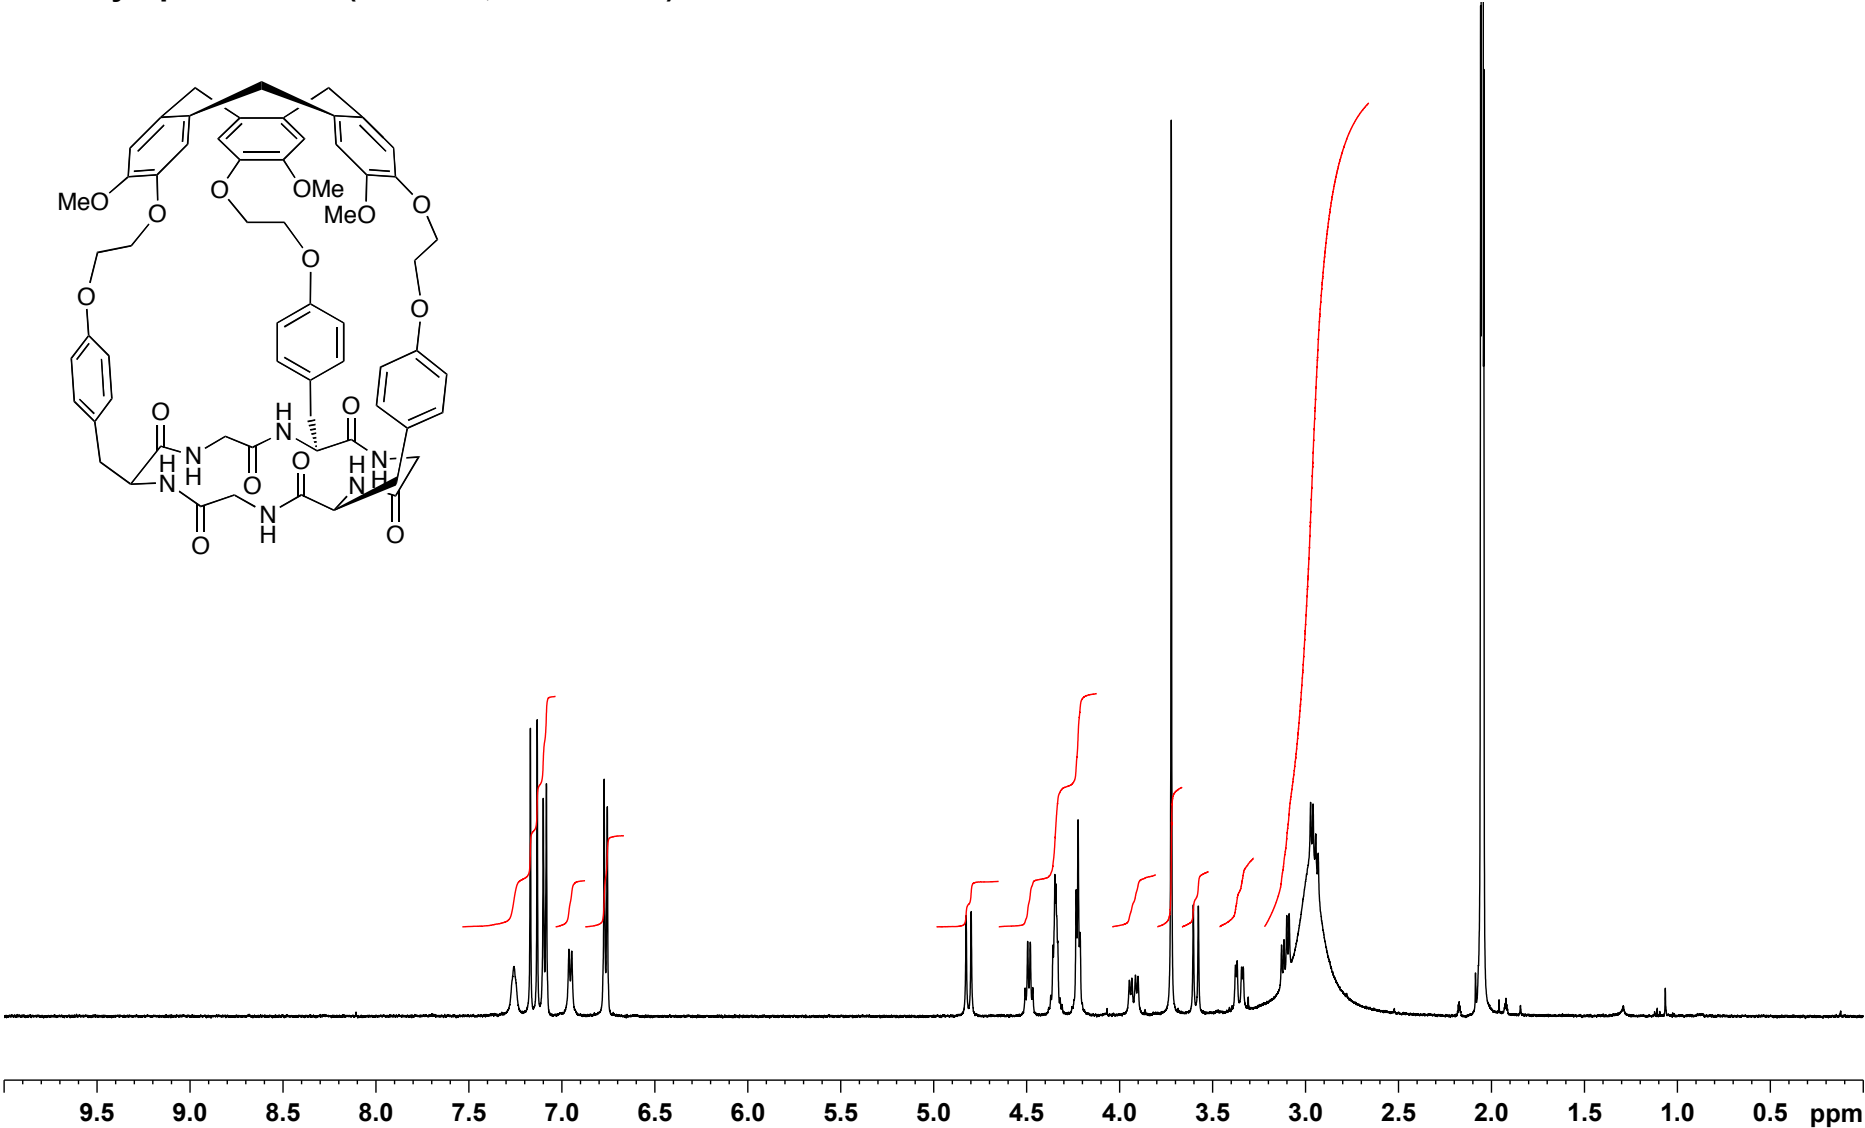

Hemicryptophane *ML-2* (500 MHz, CD<sub>3</sub>CN-*d*<sub>3</sub>)

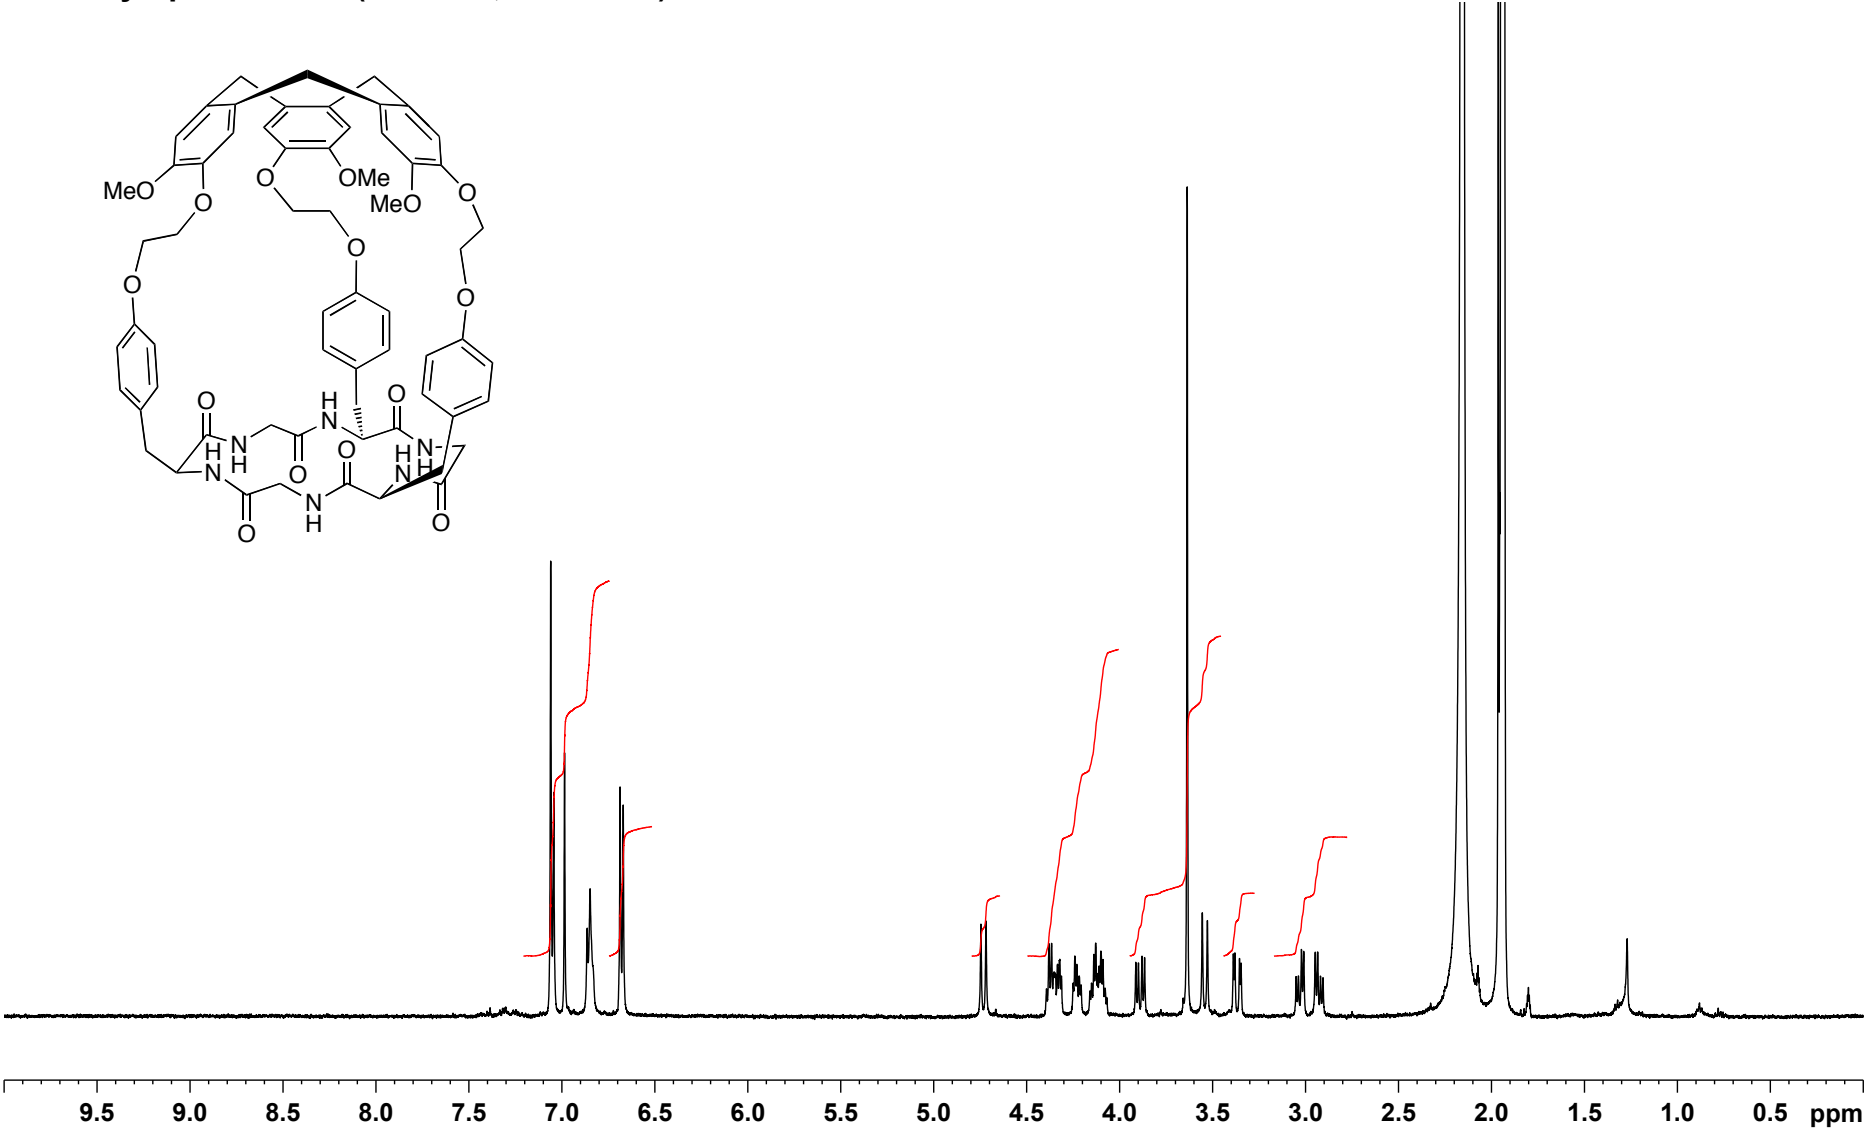

Hemicryptophane *ML-2* (125 MHz, acetone-*d*<sub>6</sub>)

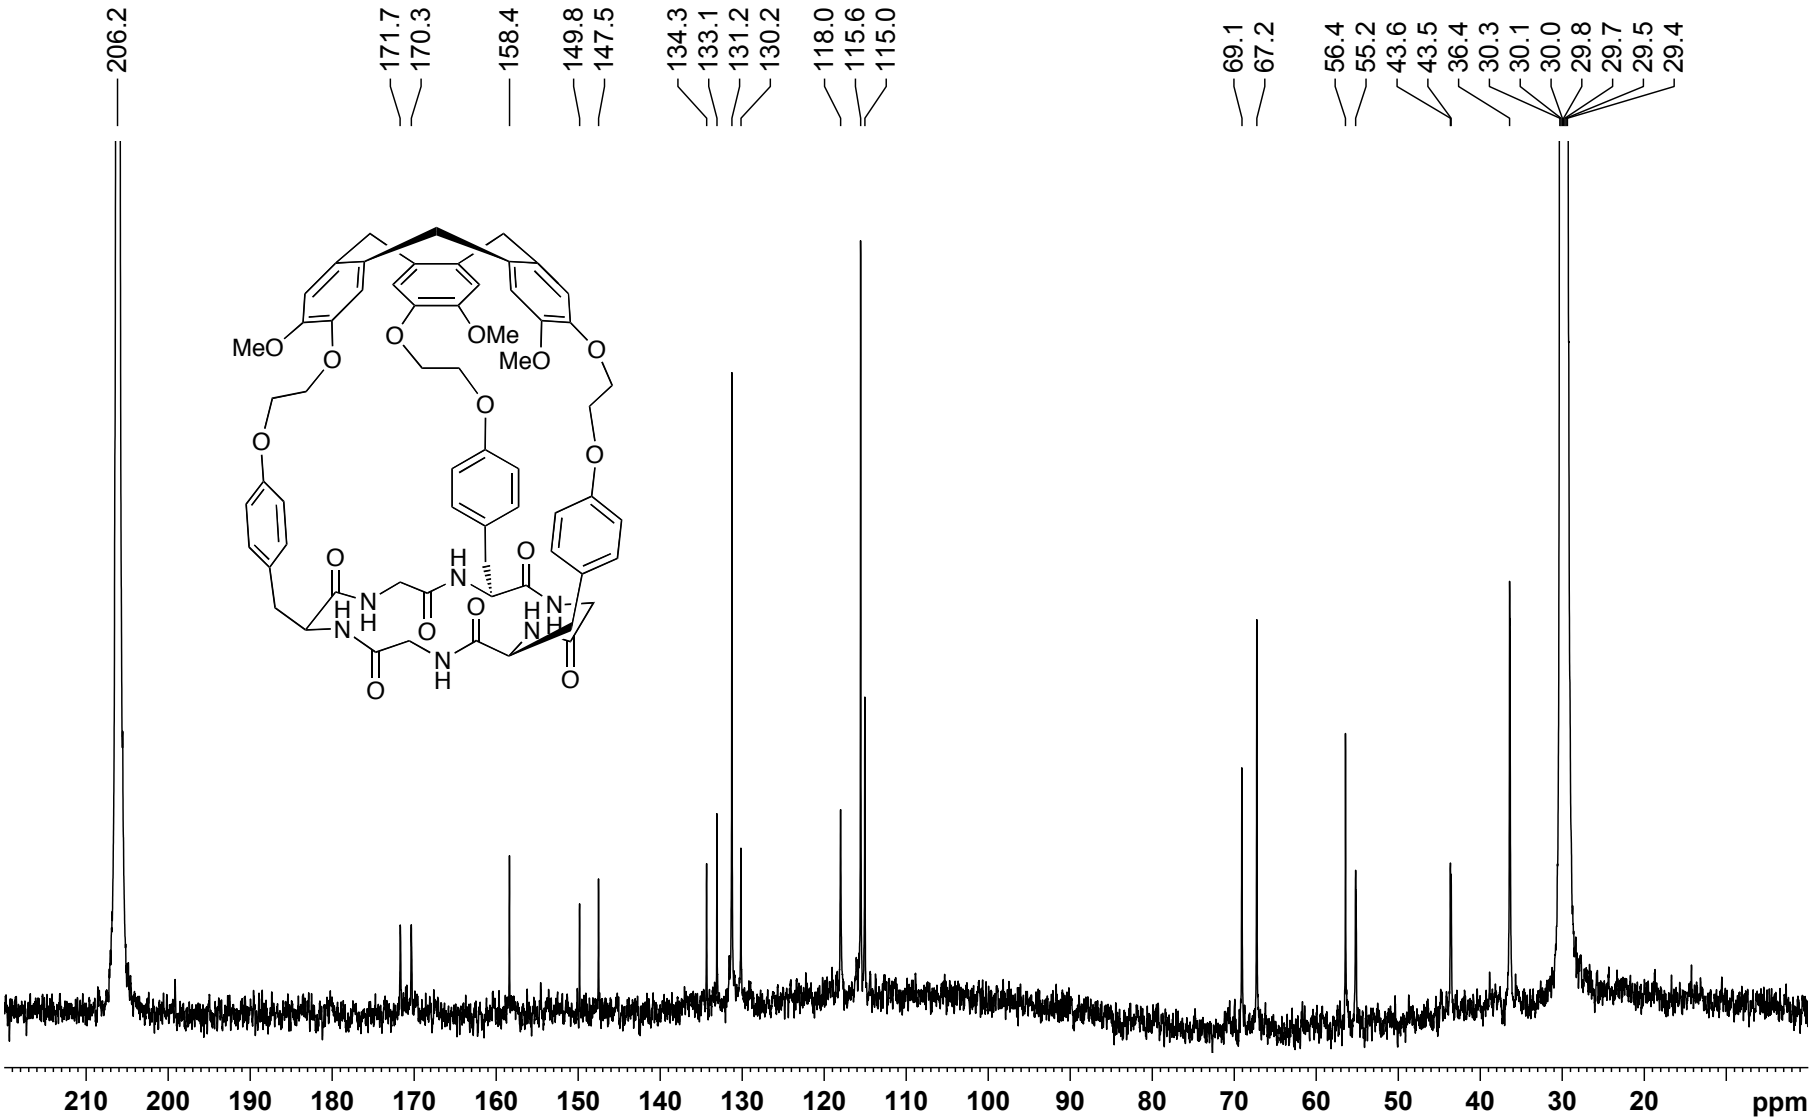

## Hemicryptophane *ML-2* (125 MHz, acetone-*d*<sub>6</sub>) COSY

Current Data Parameters  
NAME 13-2-3-2\_29072011  
EXPNO 5  
PROCNO 1

F2 - Acquisition Parameters  
Date\_ 20110801  
Time 0.12  
INSTRUM spect  
PROBHD 5 mm CPTXI 1H-  
PULPROG cosygpgf  
TD 2048  
SOLVENT Acetone  
NS 64  
DS 8  
SWH 7002.801 Hz  
FIDRES 3.419337 Hz  
AQ 0.1462772 sec  
RG 362  
DW 71.400 usec  
DE 10.00 usec  
TE 275.7 K  
D0 0.00000300 sec  
D1 1.48689198 sec  
D13 0.00000400 sec  
D16 0.00020000 sec  
IN0 0.00014295 sec

===== CHANNEL f1 =====  
NUC1 1H  
P0 8.80 usec  
P1 8.80 usec  
PL1 5.50 dB  
PL1W -1.#IND0000 W  
SFO1 499.6834978 MHz

===== GRADIENT CHANNEL =====  
GPNAM1 SINE.100  
GPZ1 10.00 %  
P16 1000.00 usec

F1 - Acquisition parameters  
TD 256  
SFO1 499.6835 MHz  
FIDRES 27.326441 Hz  
SW 14.000 ppm  
FnMODE QF

F2 - Processing parameters  
SI 1024  
SF 499.6800043 MHz  
WDW QSINE  
SSB 0  
LB 0 Hz  
GB 0  
PC 1.40

F1 - Processing parameters  
SI 512  
MC2 QF  
SF 499.6799996 MHz  
WDW States-TPPI  
SSB 0  
LB 0 Hz  
GB 0

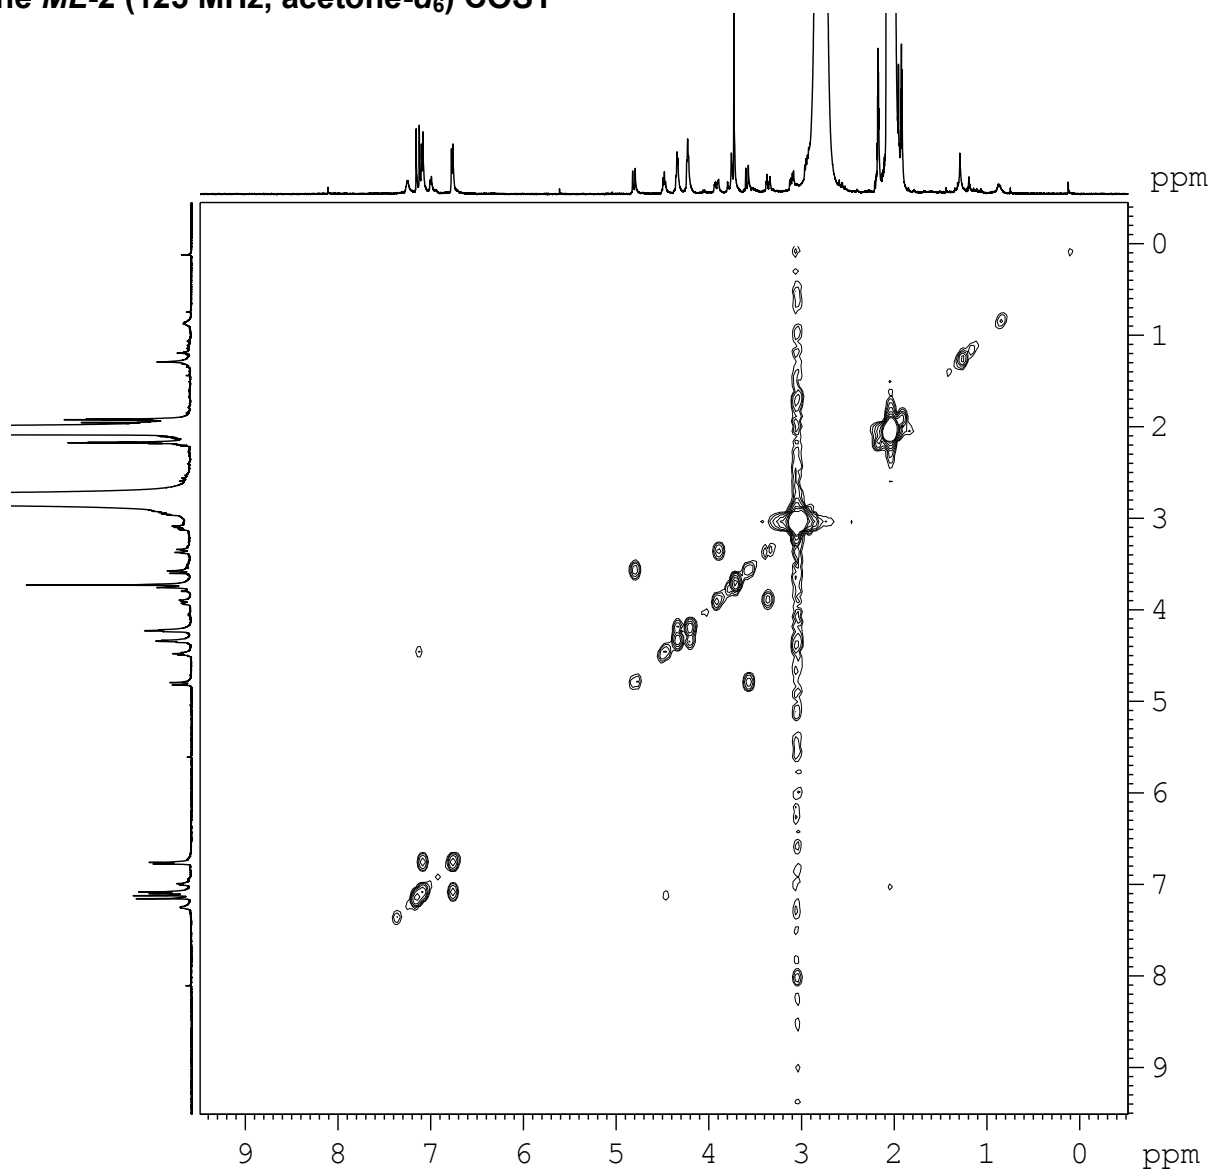

Hemicryptophane *ML-2* (125 MHz, acetone-*d*<sub>6</sub>) HSQC

Current Data Parameters  
NAME 13-2-3-2\_29072011  
EXPNO 2  
PROCNO 1

F2 - Acquisition Parameters  
Date\_ 20110729  
Time\_ 12.02  
INSTRUM spect  
PROBHD 5 mm CPTXI 1H-  
PULPROG hsqcetgp  
TD 4096  
SOLVENT Acetone  
NS 64  
DS 16  
SWH 7002.801 Hz  
FIDRES 1.709668 Hz  
AQ 0.2925044 sec  
RG 11585.2  
DW 71.400 usec  
DE 10.00 usec  
TE 305.1 K  
CNST2 145.0000000  
D0 0.00000300 sec  
D1 1.50000000 sec  
D4 0.00172414 sec  
D11 0.03000000 sec  
D13 0.00000400 sec  
D16 0.00020000 sec  
IN0 0.00001990 sec  
ZGPTNS

===== CHANNEL f1 =====  
NUC1 1H  
P1 8.80 usec  
P2 17.60 usec  
P28 0 usec  
PL1 5.50 dB  
PL1W -1.0#IND0000 W  
SFO1 499.6830042 MHz

===== CHANNEL f2 =====  
CPDPRG2 garp  
NUC2 13C  
P3 15.00 usec  
P4 30.00 usec  
PCPD2 65.00 usec  
PL2 -0.30 dB  
PL12 12.44 dB  
PL2W -1.0#IND0000 W  
PL12W -1.0#IND0000 W  
SFO2 125.6572005 MHz

===== GRADIENT CHANNEL =====  
GPNAM1 SINE.100  
GPNAM2 SINE.100  
GPZ1 80.00 %  
GPZ2 20.10 %  
P16 1000.00 usec

F1 - Acquisition parameters  
TD 512  
SFO1 125.6572 MHz  
FIDRES 49.084843 Hz  
SW 200.000 ppm  
FnMODE Echo-Antiecho

F2 - Processing parameters  
SI 4096  
SF 499.6800076 MHz  
WDW QSINE  
SSB 0  
LB 0 Hz  
GB 0  
PC 1.40

F1 - Processing parameters  
SI 1024  
MC2 echo-antiecho  
SF 125.6445383 MHz  
WDW SINE  
SSB 0  
LB 0 Hz  
GB 0

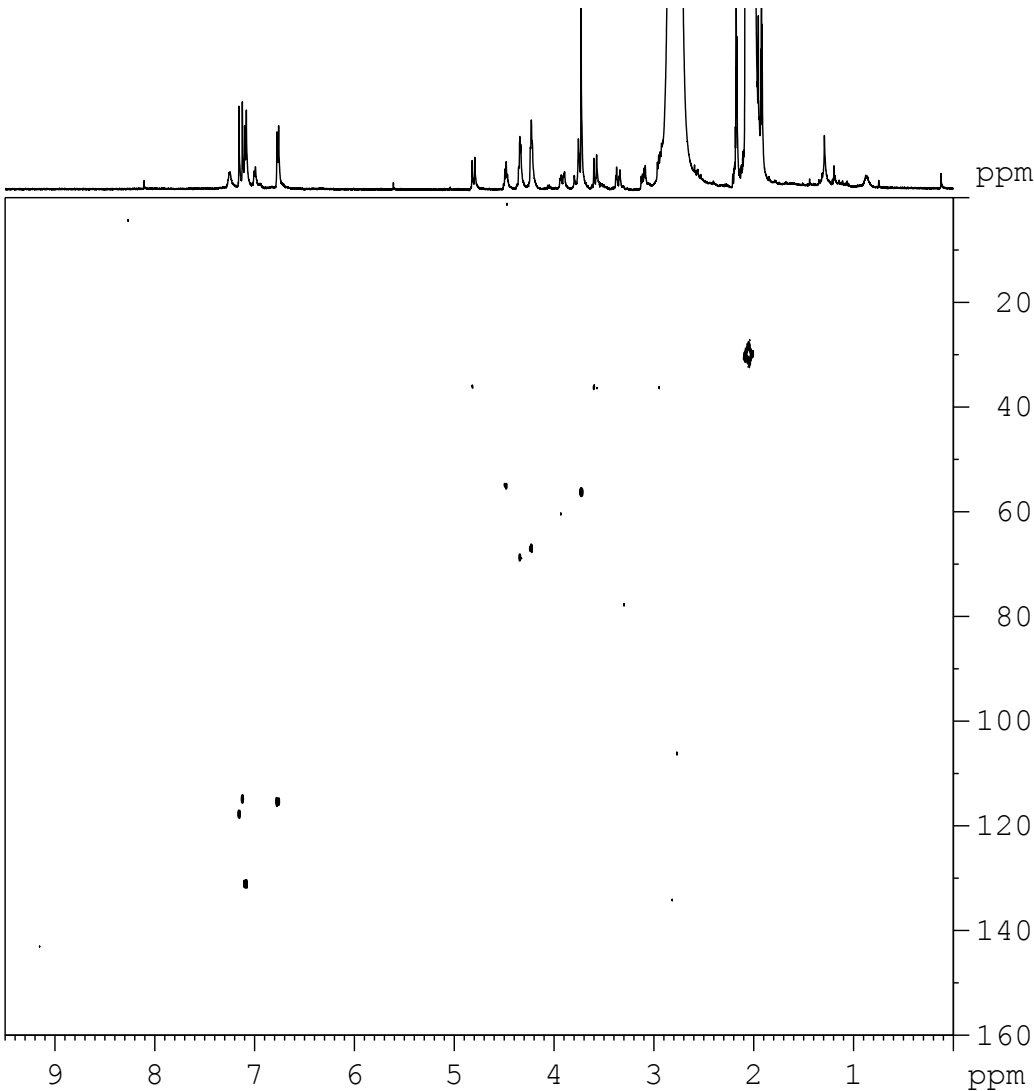

Hemicryptophane *ML-2* (125 MHz, acetone-*d*<sub>6</sub>) HMBC

Current Data Parameters  
NAME 13-2-3-2\_29072011  
EXPNO 3  
PROCNO 1

F2 - Acquisition Parameters  
Date\_ 20110730  
Time\_ 4.34  
INSTRUM spect  
PROBHD 5 mm CPTXI 1H-  
PULPROG hmbcgp1pndg1  
TD 4096  
SOLVENT Acetone  
NS 128  
DS 16  
SWH 7002.801 Hz  
FIDRES 1.709668 Hz  
AQ 0.2925044 sec  
RG 11585.2  
DW 71.400 usec  
DE 10.00 usec  
TE 305.1 K  
CNST2 145.0000000  
CNST13 10.0000000  
D0 0.00000300 sec  
D1 1.50000000 sec  
D2 0.00344828 sec  
D6 0.05000000 sec  
D16 0.00020000 sec  
IN0 0.00001810 sec

===== CHANNEL f1 =====  
NUC1 1H  
P1 8.80 usec  
P2 17.60 usec  
PL1 5.50 dB  
PL1W -1.#IND0000 W  
SFO1 499.6834978 MHz

===== CHANNEL f2 =====  
NUC2 13C  
P3 15.00 usec  
PL2 -0.30 dB  
PL2W -1.#IND0000 W  
SFO2 125.6572005 MHz

===== GRADIENT CHANNEL =====  
GPNAM1 SINE.100  
GPNAM2 SINE.100  
GPNAM3 SINE.100  
GPZ1 50.00 %  
GPZ2 30.00 %  
GPZ3 40.10 %  
P16 1000.00 usec

F1 - Acquisition parameters  
TD 512  
SFO1 125.6572 MHz  
FIDRES 53.993328 Hz  
SW 220.000 ppm  
FnMODE QF

F2 - Processing parameters  
SI 4096  
SF 499.6800000 MHz  
WDW QSINE  
SSB 2  
LB 0 Hz  
GB 0  
PC 1.40

F1 - Processing parameters  
SI 2048  
MC2 QF  
SF 125.6446360 MHz  
WDW æ·»L  
SSB 0  
LB 0 Hz  
GB 0

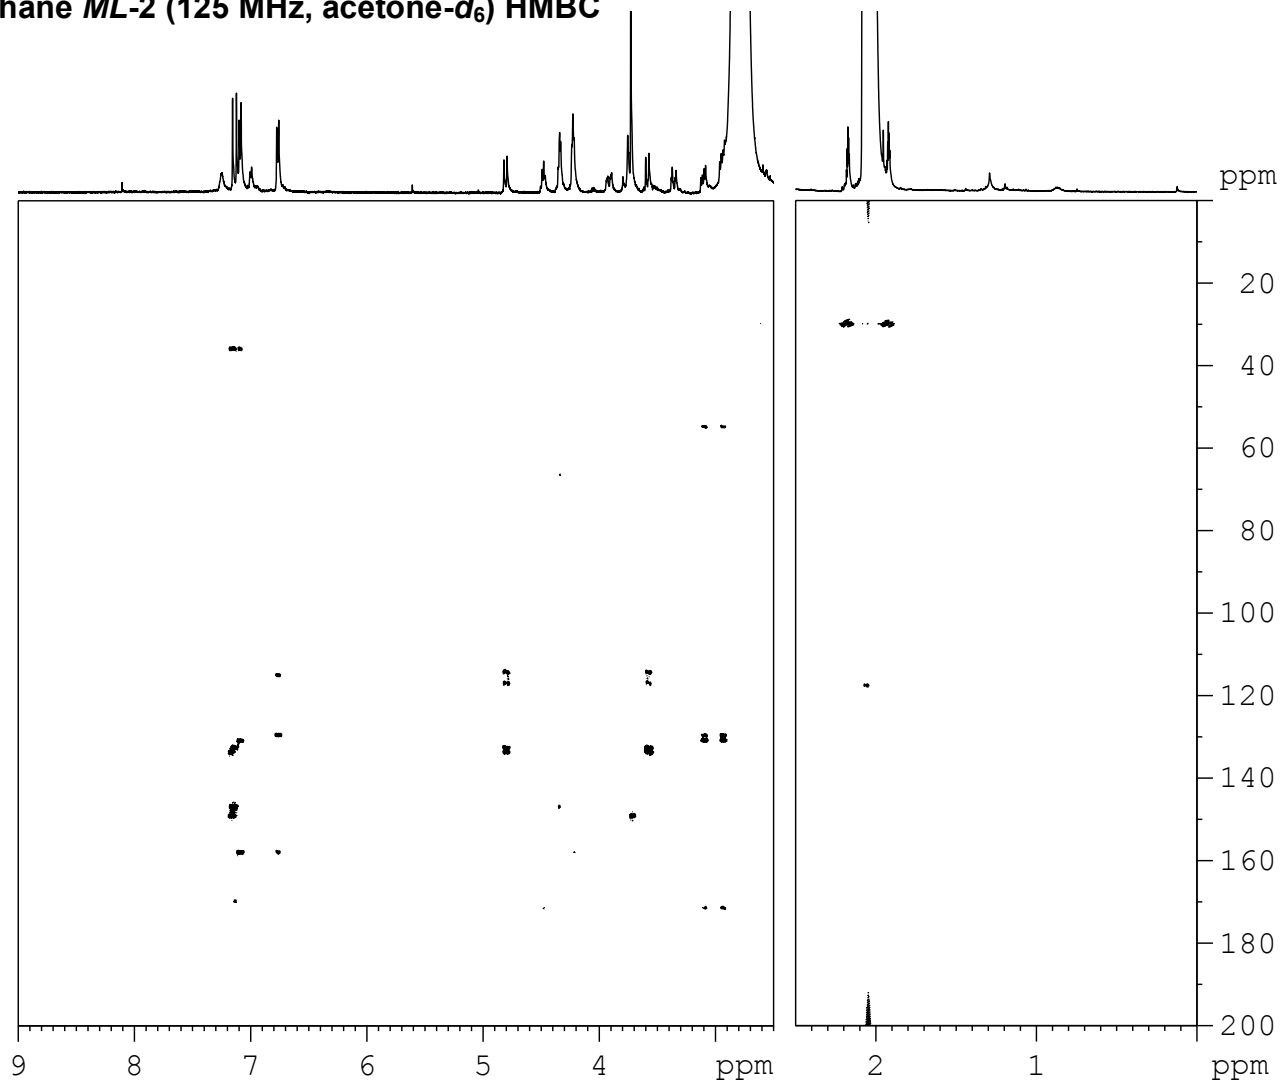

**Gaussian archive file for PL-2:R-9 complex**

1\1\GINC-R243\FOpt\ONIOM(B3LYP/6-31G(d):PM3)\Mixed\C70H81N7O18\ROOT\06  
-Aug-2013\0\#\ ONIOM(B3LYP/6-31G\*:PM3) scf=(qc,direct) nosymm freq=nor  
aman opt=(calcfc,z-matrix,maxcycle=500)\freq&geom\0,1\C,-8.602714164  
9,-4.5381807702,-0.0598931832\C,-7.9286631173,-3.8233428858,-1.0615761  
043\C,-6.6146165032,-4.1631074312,-1.3913954528\C,-5.9567313578,-5.198  
1046605,-0.7242744495\C,-6.6380197047,-5.9223480443,0.2733123907\C,-7.  
9559570077,-5.5907638971,0.5944751414\H,-6.0888466709,-3.6104093726,-2  
.1829080166\H,-8.4908770613,-6.1681391181,1.3601577945\C,-10.330492456  
6,-1.5492328621,3.6690967822\C,-10.5499029214,-1.0757765913,2.37718729  
84\C,-10.4222221084,-1.9167433567,1.2685472701\C,-10.1291162871,-3.272  
7322208,1.4545656505\C,-9.9440880043,-3.7621968731,2.7506016519\C,-10.  
0192672198,-2.9164172673,3.8578750058\H,-10.7859308733,-0.0084354876,2  
.2303477733\H,-9.7362777101,-4.8334649879,2.9105690787\C,-8.9603251755  
,0.6067389643,-0.0233555804\C,-7.7125739287,1.1897366431,-0.2485371031  
\C,-6.7360860083,0.4769655213,-0.9792742458\C,-7.056611546,-0.77887292  
99,-1.5039953802\C,-8.2984422668,-1.3671794426,-1.2516803894\C,-9.2459  
643946,-0.6804325572,-0.4829325751\H,-9.7146324657,1.1770806821,0.5450  
680487\H,-6.3140925112,-1.3187343678,-2.1083687352\C,-10.0250155801,-4  
.2302180448,0.3048438903\H,-10.5492466648,-3.8049272588,-0.5866888543\  
H,-10.5625209005,-5.167040782,0.5551191771\C,-10.5553793253,-1.3005143  
247,-0.0930881203\H,-10.8604751047,-2.0732077954,-0.839310974\H,-11.36  
15750517,-0.5402202725,-0.0966274994\C,-8.5851767966,-2.7186860757,-1.  
8345113813\H,-8.2437320115,-2.7431529075,-2.8893968274\H,-9.6882315624  
, -2.8956523815,-1.8685179981\O,-7.3979205344,2.4721726266,0.1729484728  
\O,-5.3998932045,0.8363635885,-1.1241529479\O,-10.4079958841,-0.758213  
4751,4.8146822673\O,-9.8462559474,-3.3456141801,5.1620650083\O,-5.9927  
897799,-7.0273292456,0.8410119952\O,-4.6076113485,-5.3924947586,-0.991  
3791946\C,-5.8676272281,-7.0007586298,2.2772163468\H,-6.6983633897,-7.  
5537271974,2.7436996421\H,-5.8785784725,-5.9775488522,2.6760404929\C,-  
4.3424346832,-6.467790275,-1.8672871365\H,-3.2527125352,-6.4409419891,  
-1.9471158785\H,-4.80060322,-6.3108521668,-2.8500668952\H,-4.669641677  
9,-7.4288476226,-1.4559764053\C,-9.0876014835,-4.5204835772,5.31932546  
9\H,-8.0246768773,-4.324923816,5.1259341555\H,-9.4246809168,-5.3390653  
574,4.6655072631\C,-10.2704371738,0.6710873333,4.6261183334\H,-11.2180  
954183,1.1491795222,4.8988125973\H,-10.0493747209,0.948669439,3.580947  
2843\C,-8.038280794,2.9003972544,1.3557727533\H,-7.7936979253,3.964997  
6743,1.3948908669\H,-7.628216007,2.3830508708,2.2327435364\H,-9.128180  
9633,2.7511281476,1.322579434\C,-4.5535254071,-7.6825310096,2.63514494  
06\H,-4.5125269558,-7.8863676874,3.7126320786\H,-4.5037408501,-8.63819  
33764,2.1049706707\C,-9.1361633596,1.1733075698,5.5171605675\H,-9.4387  
610627,1.1387335008,6.5728397399\H,-8.2552766389,0.5262895872,5.396823  
1305\O,-3.4138975652,-6.9495151892,2.2035344206\O,-8.8449715045,2.4971  
011208,5.0973608735\C,-1.9059397634,2.9770180275,-2.6112156654\C,-0.64  
52195659,3.1165871109,-2.0324196961\C,-2.8870579555,3.94176242,-2.3707  
909521\C,-0.3312983272,4.2060572412,-1.2122120099\H,0.1071137018,2.348  
7847347,-2.2128514518\C,-2.5726985983,5.0716506593,-1.615329343\C,-1.3  
063785591,5.1993318676,-1.0518514281\H,-3.3370057359,5.827042095,-1.45  
79775139\H,-1.0828224198,6.0813987446,-0.4548003476\C,-2.7821071254,-6  
.0731386642,3.0455006254\C,-1.5431339268,-5.5971008282,2.5908900817\C,  
-3.2539963563,-5.6468008576,4.2929238913\C,-0.7779565299,-4.7492166101  
,3.3832467295\H,-1.1855508757,-5.9337066835,1.6227642283\C,-2.46380272  
63,-4.7948233103,5.0781725162\H,-4.2072252026,-5.988372299,4.683664740  
7\C,-1.214247617,-4.33006386,4.6525296377\H,0.1975598916,-4.4355912069  
,3.0169268795\H,-2.8364154676,-4.4975228757,6.0566745147\C,-7.73520093  
09,3.1180452451,5.6323888357\C,-7.0937051327,2.7078257025,6.8023745524  
\C,-7.2529124144,4.2299496166,4.9327305613\C,-5.9670722964,3.406004867  
4,7.2483677217\H,-7.4588039632,1.8608543452,7.3740716797\C,-6.12879765  
72,4.9099996218,5.3913514103\H,-7.7627984221,4.5369806484,4.0234075984  
\C,-5.44960499,4.5029492843,6.5513360628\H,-5.4747635806,3.073373732,8  
.1603324587\H,-5.7613154207,5.7673273439,4.8297649267\C,-0.3227576076,

-3.5083411685,5.5837805669\H,0.6967063184,-3.9416128067,5.5567731933\H  
,-0.6812260722,-3.6497741555,6.6205855115\H,-0.2949985798,-2.053891462  
9,3.2532962314\H,-0.6480305127,0.2970874962,6.5458676688\H,0.770662367  
3,2.1453314546,2.9459640041\H,-3.1684593175,3.1913559275,4.9348772227\  
H,-1.1818971236,4.377340368,4.3114422408\H,-0.9304917285,3.9008870801,  
1.4750456717\C,-4.1873841682,5.2119245261,7.0420977474\H,-4.3177965997  
,6.3091654236,6.9628707311\H,-4.0677557035,4.9986652385,8.1218304054\C  
,1.0321173144,4.3148280923,-0.5381362673\H,1.7924324295,3.8106976751,-  
1.1660556618\H,1.3309564315,5.3812657864,-0.4945490784\C,-1.5361394336  
, -1.2430423901,5.5161498107\C,-2.5891512428,5.6585965752,5.076569956\C  
,1.1054020339,2.1946512567,0.9147760613\C,0.8026505411,-0.3720794739,3  
.7098056995\C,0.0568796129,5.5073294968,2.3442962957\C,-2.314122342,2.  
3189729879,6.5922365569\O,-3.2270787071,6.6563397847,4.7717363008\O,1.  
0983142436,6.1467121797,2.3260424429\O,1.2321035606,1.4747118761,-0.06  
4379243\O,-2.5907892288,-1.6111374546,5.0024799116\O,-1.6787633664,2.5  
227851543,7.6172857484\N,-1.4168569136,5.3478191493,4.3283199832\N,-0.  
0007754605,4.2074211532,1.7715251107\N,1.0843592689,1.5657433725,2.195  
5020334\N,0.3110127058,-1.7028693997,3.9665843422\N,-1.5429377817,-0.0  
670176102,6.2948323997\N,-3.006397119,3.3577210792,5.9241700902\O,1.36  
98175185,0.2098386756,4.6177575555\C,0.5903707343,0.174973849,2.307943  
4239\H,1.1301303667,-0.4562846007,1.5718175392\H,-0.5018436521,0.11012  
19977,2.0554371891\C,-1.217993953,6.013003201,3.0165755126\H,-1.142515  
1568,7.104881737,3.2001976468\H,-2.0917041726,5.8687186101,2.343028031  
8\C,-2.5473263391,0.9620964418,5.9453519108\H,-3.5429392607,0.58468706  
76,6.259090736\H,-2.5918931775,1.1110878526,4.8155804441\C,-0.21028662  
84,-1.9998857039,5.330853848\H,0.5525007325,-1.6216881894,6.0629766694  
\C,1.0962984174,3.7318889543,0.884698842\H,2.0709633806,4.0600938523,1  
.3336648\C,-2.8972733943,4.7862438705,6.3094896423\H,-2.0422935718,4.9  
288032173,7.0215276343\O,-4.175995198,3.8487530114,-2.8720971104\C,-4.  
8158383218,2.5823222277,-2.73411505\H,-4.2251228166,1.7716132322,-3.17  
81985642\H,-5.7500233753,2.6645839815,-3.2997519573\C,-5.0771471362,2.  
2514112841,-1.2615244695\H,-4.1711158218,2.4116157553,-0.6706527866\H,  
-5.8721907009,2.8914910969,-0.8362175963\H,-2.1155954582,2.1180149634,  
-3.2418135723\H,-9.2448563812,-4.7740023059,6.3701596667\C,-4.46831934  
35,0.2826657442,2.214736812\C,-3.0594141885,0.6796048349,1.7234838602\  
H,-2.2925014665,0.0199175564,2.1719911544\H,-3.0169365449,0.5660037404  
,0.6359111842\C,-4.6485099103,-1.2265229752,2.0773573801\H,-4.74313515  
35,-1.4907754257,1.0199299512\H,-3.8074877619,-1.7715641053,2.51678828  
46\C,-2.7054793283,2.132335382,2.1398219306\O,-2.6948748444,2.31004629  
9,3.4105593853\O,-2.4417262881,2.9626811614,1.253856401\N,-5.901714271  
7,-1.7932182948,2.7858479571\C,-5.6067412101,-2.0345797055,4.248364098  
6\H,-4.8309864363,-2.8016108809,4.3199523208\H,-6.5256629243,-2.378618  
6828,4.7312008641\H,-5.2466511383,-1.0965616048,4.6680834025\C,-6.2463  
918008,-3.0987398863,2.1533054049\H,-6.538338171,-2.9378511212,1.10818  
96004\H,-7.0826417204,-3.5527764724,2.69771264\H,-5.3723224135,-3.7513  
487454,2.1946672411\C,-7.0630935332,-0.8512705191,2.6657384805\H,-7.27  
0797115,-0.6676980485,1.6046705037\H,-6.8028557419,0.077257514,3.17020  
78078\H,-7.936675581,-1.3157285352,3.1376482098\H,-5.1899666447,0.7793  
443891,1.5467448645\O,-4.7390842522,0.6547924064,3.5545138024\H,-4.025  
8457086,1.3157488978,3.7987535745\\Version=ES64L-G09RevD.01\HF=-0.4154  
77\RMSD=0.000e+00\RMSF=6.740e-07\Dipole=-6.0586915,-7.4177284,-0.92060  
79\PG=C01 [X(C70H81N7O18)]\@
